# Supplementary material for: Radical anions of 1,1-azoliumdithiocarboxylates
Source: Royal Society of Chemistry journal article supplement (doi:10.1039/d4cc05486e), 2024-01-01
Supplement: d4cc05486e1.pdf [file d4cc05486e1.pdf]

## Electronic Supplementary Information for

### Radical anions of 1,1-azoliumdithiocarboxylates

M. S. Luff<sup>a</sup>, K. Oppel<sup>a</sup>, I. Krummenacher<sup>a,b</sup>, H. Braunschweig<sup>a,b</sup>, U. Radius<sup>a\*</sup>

<sup>a</sup> Institute for Inorganic Chemistry, Julius-Maximilians-Universität Würzburg, Am Hubland, 97074 Würzburg, Germany.

<sup>b</sup> Institute for Sustainable Chemistry & Catalysis with Boron, Julius-Maximilians-Universität Würzburg, Am Hubland, 97074 Würzburg, Germany.

\*Corresponding author Email address: [u.radius@uni-wuerzburg.de](mailto:u.radius@uni-wuerzburg.de)

#### Author contributions

M.S.L. and U.R. conceived of the project; M.S.L. did most of the experimental, K.O. added CV and SC-XRD analyses I. K. EPR spectroscopy, U.R. quantum-chemical calculations.; M.S.L., U.R. and H.B. wrote the manuscript.

## Table of Content

|     |                                                            |    |
|-----|------------------------------------------------------------|----|
| 1   | Additional Figures, Tables and Discussions.....            | 3  |
| 2   | Experimental Section.....                                  | 7  |
| 2.1 | General Information .....                                  | 7  |
| 2.2 | Experimental details.....                                  | 8  |
| 3   | NMR Section .....                                          | 12 |
| 3.1 | General Information .....                                  | 12 |
| 3.2 | NMR Spectra .....                                          | 12 |
| 4   | EPR Section .....                                          | 14 |
| 4.1 | General Information .....                                  | 14 |
| 4.2 | EPR Spectra .....                                          | 14 |
| 5   | IR Section .....                                           | 17 |
| 5.1 | General Information .....                                  | 17 |
| 5.2 | IR Spectra .....                                           | 17 |
| 6   | Electrochemical Section .....                              | 20 |
| 6.1 | General Information .....                                  | 20 |
| 6.2 | Cyclovoltammograms .....                                   | 20 |
| 7   | UV/VIS/NIR Section.....                                    | 22 |
| 7.1 | General Information .....                                  | 22 |
| 7.2 | UV/VIS/NIR Spectra.....                                    | 22 |
| 8   | Crystallographic Section.....                              | 25 |
| 8.1 | General Information .....                                  | 25 |
| 8.2 | Crystal Data .....                                         | 26 |
| 9   | Quantumchemical Calculations Section.....                  | 31 |
| 9.1 | General Information .....                                  | 31 |
| 9.2 | Cartesian Coordinates of Geometry-optimized Molecules..... | 31 |
| 10  | References.....                                            | 38 |

## 1 Additional Figures, Tables and Discussions

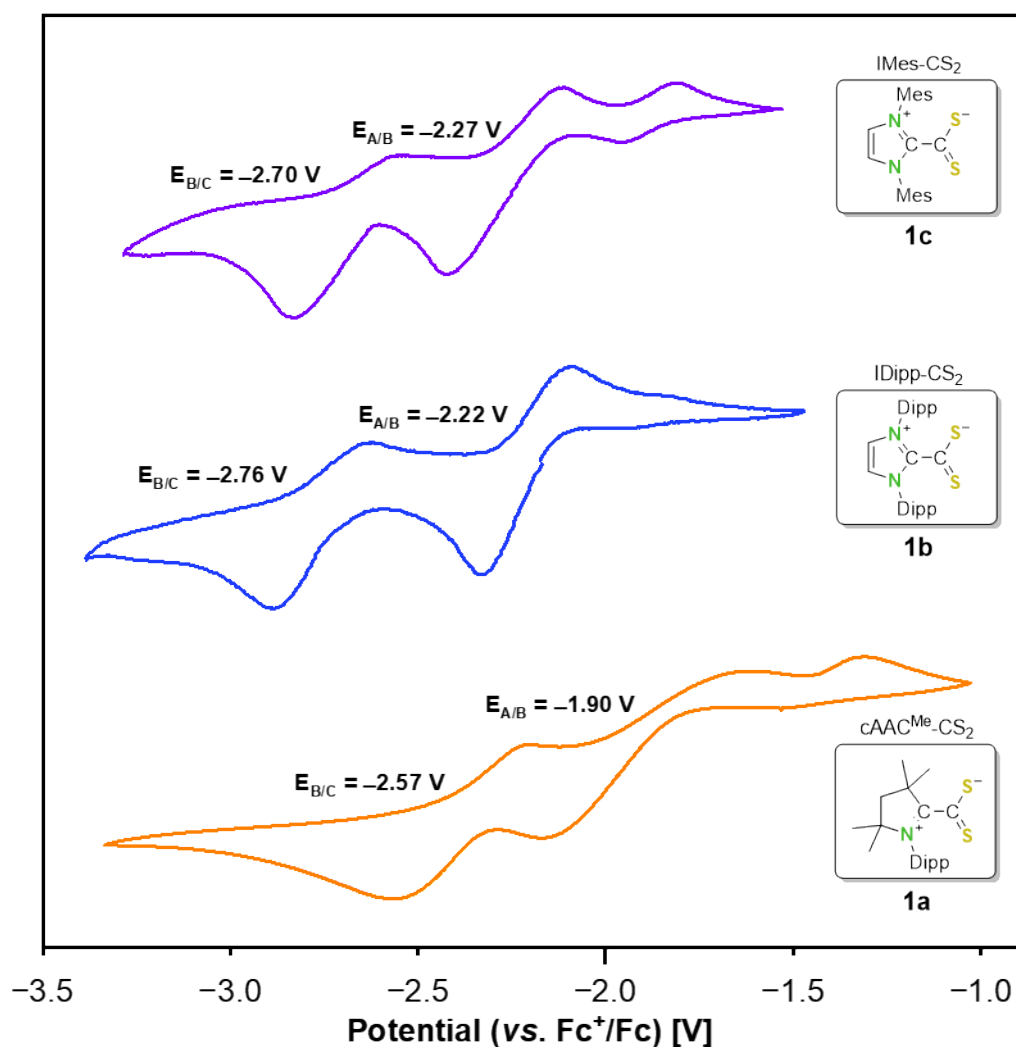

**Figure S1.** Cyclic voltammograms of the A/B, B/C redox-couples (see Scheme 3 of the main text) of the carbene-CS<sub>2</sub> compounds **1a–c** in THF (concentrations ca. 1 mM) and [TBA][PF<sub>6</sub>] (TBA = tetra(*n*-butyl)ammonium; 0.1 M) as electrolyte. Potentials were internally referenced relative to the ferrocenium/ferrocene (Fc<sup>+</sup>/Fc) redox-couple with negative sweep directions. For clarity, due to varying resolution of the redox-events at different scan velocities ( $v$ ), the curves containing the best separation of the occurring redox-events are shown in the region between -0.8 V and -3.5 V at different values of  $v$  (cAACMe-CS<sub>2</sub> (**1a**): 25 mV/s; IDipp-CS<sub>2</sub> (**1b**): 50 mV/s; IMes-CS<sub>2</sub> (**1c**): 10 mV/s).

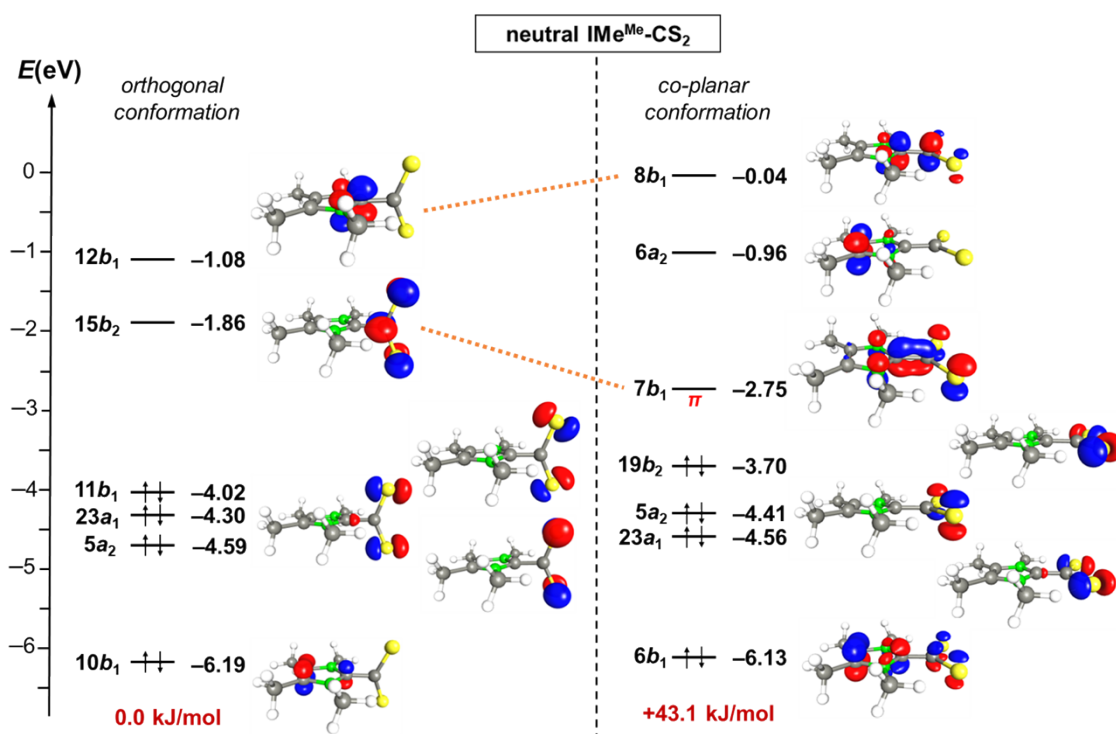

**Figure S2.** Quantum-chemical DFT calculations (B3LYP/def2-TZVP) of  $\text{IMe}^{\text{Me}}\text{-CS}_2$  in an ideal orthogonal- (left) and a co-planar (right) conformation of the  $\text{CS}_2$ -moiety relative to the plane of the carbene ring ( $C_{2v}$  restricted symmetry).

To gain insight into a theoretical description of the bonding situation present in radical mono-anions of the type  $[\text{carbene-CS}_2]^-$ , a row of DFT calculations were performed at the B3LYP/def2-TZVP level of theory (for details see section 9). To evaluate the important frontier molecular orbitals (FMOs) of NHC-substituted dithiocarboxylates on an easy-to-analyze system and to save computational effort these calculations have been performed on the model system  $\text{IMe}^{\text{Me}}\text{-CS}_2$  (Figure S2). The neutral molecule  $\text{IMe}^{\text{Me}}\text{-CS}_2$  was optimized in symmetry-restricted orthogonal and co-planar conformations.

The orthogonal alignment of the  $\text{CS}_2$  moiety relative to the plane of the carbene ring is favored by 43.1 kJ/mol for neutral  $\text{IMe}^{\text{Me}}\text{-CS}_2$  with respect to a co-planar alignment. Rotation of the  $\text{CS}_2$  moiety of the orthogonal structure along the central C–C axis by  $90^\circ$  into the carbene plane does essentially not affect the occupied orbitals too much but switches on  $\pi$ -interaction between the carbene and the  $\text{CS}_2$ -moiety. Upon planarization the MOs  $15b_2$  ( $\text{CS}_2$ -centered) and  $12b_1$  (carbene-centered) mix into the  $\pi$ -bonding orbital  $7b_1$  and the  $\pi^*$ -anti-bonding orbital  $8b_1$ , highlighted in orange dashes in Figure S2. These orbitals are unoccupied for the neutral dithiocarboxylates, and the  $\pi$ -bonding orbital  $7b_1$  is the LUMO of neutral, co-planar  $\text{IMe}^{\text{Me}}\text{-CS}_2$ . This orbital becomes occupied upon reduction of the neutral carbene- $\text{CS}_2$  adducts to yield the mono- and di-anionic forms **B** and **C**, which is in line with the observed changes in the C–C distances for **2a–c** and **3** as presented above.

Calculations on the orthogonal and in-plane structure of the anionic  $[\text{IMe}^{\text{Me}}\text{-CS}_2]^-$  radical show that the orthogonal conformer, in which the additional electron is either located at the carbene (SOMO:  $15b_2$ ) or at the  $\text{CS}_2$  group (SOMO:  $12b_1$ ) are 133.3 kJ/mol and 75.2 kJ/mol, respectively, higher in energy compared to the in-plane  $p$ -radical (SOMO:  $7b_1$ ), in which the additional electron is delocalized. The calculated energy minimum structure of the non-constrained radical mono-anion  $[\text{IMe}^{\text{Me}}\text{-CS}_2]^-$  confirms a slightly twisted conformation with a  $\angle\text{NCCS}$  dihedral angle of  $29.7^\circ$ , which is favored by 10.3 kJ/mol over the symmetry-restricted co-planar form.

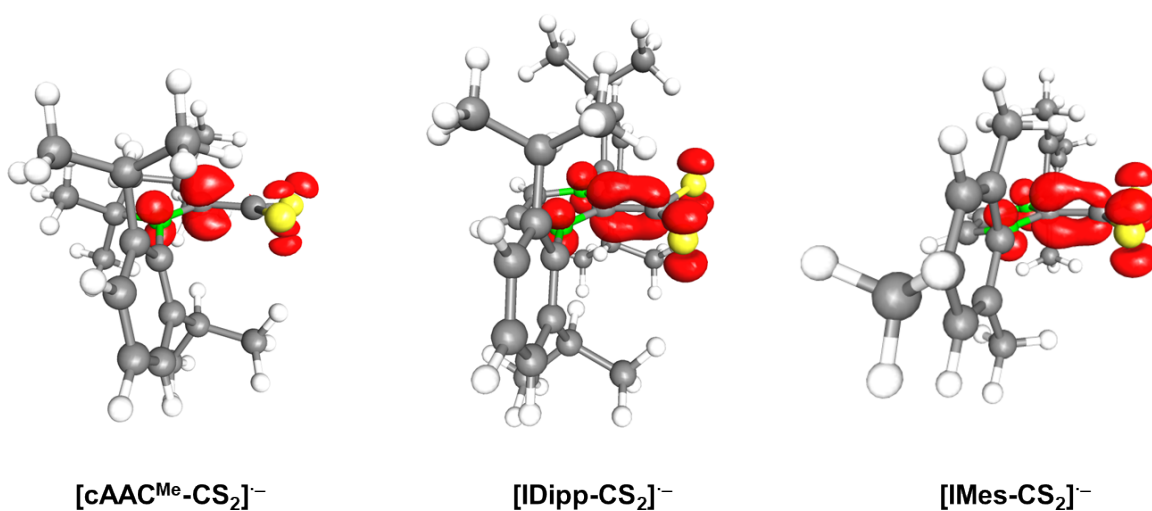

**Figure S3.** DFT (B3LYP/def2-TZVP) spin-density of the radical anions  $[\text{cAAC}^{\text{Me}}\text{-CS}_2]^-$ ,  $[\text{IDipp}\text{-CS}_2]^-$  and  $[\text{IMes}\text{-CS}_2]^-$  obtained from quantum-chemical calculations.

**Table S1.** Selected structural parameters of the compounds cAAC<sup>Me</sup>-CS<sub>2</sub> (**1a**), [K(THF)(18-crown-6)(cAAC<sup>Me</sup>-CS<sub>2</sub>)] (**2a·THF**), [K(18-crown-6)(IDipp-CS<sub>2</sub>)] (**2b**), [Mg(<sup>Dipp</sup>NacNac)(cAAC<sup>Me</sup>-CS<sub>2</sub>)] (**3**) and comparable literature-known systems. Bond lengths in Å and angles in °.

|                                                                                  | <i>d</i> (C–S)         | <i>d</i> (C–C) <sup>a</sup> | <i>d</i> (C–N) <sup>b</sup> | <i>d</i> (S–K/Mg)     | ∠SCS     | Twist-angle<br>(∠NCCS) |
|----------------------------------------------------------------------------------|------------------------|-----------------------------|-----------------------------|-----------------------|----------|------------------------|
| cAAC <sup>Me</sup> -CS <sub>2</sub> ( <b>1a</b> )                                | 1.653(3),<br>1.681(3)  | 1.485(3)                    | 1.307(3)                    | —                     | 131.0(1) | 83.7(3)                |
| IDipp-CS <sub>2</sub> ( <b>1b</b> ) <sup>[1]</sup>                               | 1.665(2),<br>1.651(2)  | 1.495(3)                    | 1.326(2),<br>1.326(2)       | —                     | 131.5(1) | 92.0(2),<br>88.0(2)    |
| IMes-CS <sub>2</sub> ( <b>1c</b> ) <sup>[1]</sup>                                | 1.667(3),<br>1.669(3)  | 1.483(8),<br>1.489(7)       | 1.336(5),<br>1.342(5)       | —                     | 129.1(4) | 65.3(2),<br>62.0(4)    |
| [K(THF)(18-crown-6)<br>(cAAC <sup>Me</sup> -CS <sub>2</sub> )] ( <b>2a·THF</b> ) | 1.728(2),<br>1.723(3)  | 1.410(3)                    | 1.393(3)                    | 3.116(1),<br>3.351(1) | 117.9(1) | 10.9(3)                |
| [K(18-crown-6)(IDipp-CS <sub>2</sub> )] ( <b>2b</b> ) <sup>c</sup>               | 1.709(1),<br>1.737(9)  | 1.415(1)                    | 1.375(1),<br>1.386(1)       | 3.221(1),<br>3.247(1) | 122.5(1) | 29.1(1),<br>31.3(1)    |
| [K(18-crown-6)(IMes-CS <sub>2</sub> )] ( <b>2c</b> )                             | 1.734(3),<br>1.733(3)  | 1.407(5)                    | 1.388(4),<br>1.387(4)       | 3.216(1),<br>3.212(8) | 124.0(2) | 31.2(4),<br>31.8(4)    |
| [Mg( <sup>Dipp</sup> NacNac)(cAAC <sup>Me</sup> -CS <sub>2</sub> )] ( <b>3</b> ) | 1.736(2),<br>1.727(2)  | 1.420(2)                    | 1.358(2)                    | 2.443(1),<br>2.430(1) | 115.8(1) | 0.0(2)                 |
| [iPr <sup>Me</sup> -CS <sub>2</sub> ] <sup>2-</sup> [2]                          | 1.803(8),<br>1.764(11) | 1.375(13)                   | 1.455(10),<br>1.454(15)     | 3.156 <sup>avg</sup>  | 117.6(5) | 4.8(14),<br>8.4(14)    |

<sup>a</sup> Regarding the bond between the CS<sub>2</sub> group and the carbenic carbon atom. <sup>b</sup> Regarding the bond to the carbenic carbon atom. <sup>c</sup> Structure obtained from a co-crystal of **2b** with the neutral adduct **1b** (87:13).

## 2 Experimental Section

### 2.1 General Information

All reactions and subsequent manipulations involving organometallic reagents were performed under argon atmosphere by using standard Schlenk techniques or in a Glovebox (Innovative Technology Inc. and MBraun Uni Lab) as reported previously.<sup>[3]</sup> All reactions were carried out in oven-dried glassware. Benzene, MeCN, THF, toluene, dichloromethane and *n*-hexane were obtained from a solvent purification station (Innovative Technology) by previous purification through alumina columns and then freshly distilled (THF, *n*-hexane, benzene) from sodium as a drying agent with benzophenone as an indicator. The deuterated solvents were purchased from Sigma-Aldrich and dried thoroughly over molecular sieves. The NHCs (= IMes, IDipp)<sup>[4]</sup> and cAAC<sup>Me</sup><sup>[5]</sup> as well as the reductants  $[\text{Mg}(\text{DippNacNac})_2]$ <sup>[6]</sup> and  $\text{KC}_8$ <sup>[7]</sup> were prepared according to published procedures. The 1,1-azoliumdithiocarboxylates were prepared according to adapted literature procedures.<sup>[1]</sup> 18-crown-6 was commercially obtained from Sigma-Aldrich and recrystallized from dry acetonitrile prior to use. Elemental analyses were performed in the microanalytical laboratory of the University of Würzburg with an Elementar Vario Micro Cube. Determinations of the magnetic moments were performed according to *Evans'* method using approximately 10–20 mg of the isolated or *in-situ* generated products. For this, frequency shifts were measured using <sup>1</sup>H NMR spectroscopy by detection of the shift of the residual proton signals of the deuterated solvents in solution containing the paramagnetic samples relative to the respective shift of an added sealed glass capillary containing the respective neat deuterated solvent.<sup>[8]</sup>

## 2.2 Experimental details

### General synthesis for 1,1-azoliumdithiocarboxylates:<sup>[1]</sup>

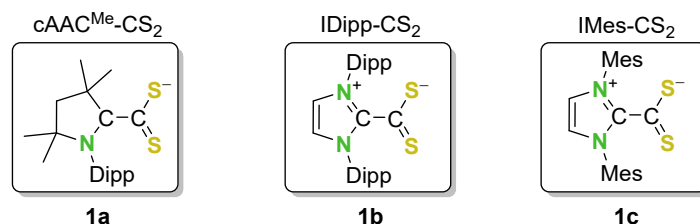

CS<sub>2</sub> (2.0 eq.) was added to a solution of the carbene (1.0 eq., batch sizes *ca.* 0.5 g – 4.0 g) in THF (20 mL). After stirring at room temperature for 1 h, all volatiles were evaporated *in vacuo*. The residue was suspended in *n*-hexane. After filtration the residue was washed with *n*-hexane (3 x 10 mL) and dried *in vacuo* to afford the 1,1-azoliumdithiocarboxylates (**1a–c**) as red to orange solids in yields of 72–94%. The spectroscopical data obtained for **1b** and **1c** match the values reported in literature.

### Literature known compounds:

#### IDipp-CS<sub>2</sub> (**1b**)<sup>[1]</sup>

IDipp-CS<sub>2</sub> (**1b**) was synthesized according to the general route using 1.0 eq of IDipp (2.00 g, 5.15 mmol) and 2.0 eq of CS<sub>2</sub> (783.7 mg, 621.9  $\mu$ L, 10.3 mmol). **Yield:** 91% (2.19 g, 4.70 mmol) of a red solid. **<sup>1</sup>H NMR** (400.1 MHz, CDCl<sub>3</sub>):  $\delta$  = 7.43 (m, 2H, *para*-CH), 7.23 (m, 4H, *meta*-CH), 7.01 (s, 2H, CH<sub>backbone</sub>), 3.00 (sept, 4H, <sup>3</sup>J<sub>H-H</sub> = 8.0 Hz, CH<sub>methine</sub>), 1.33 (d, 12H, <sup>3</sup>J<sub>H-H</sub> = 8.0 Hz, CH<sub>3 methine</sub>), 1.15 (d, 12H, <sup>3</sup>J<sub>H-H</sub> = 8.0 Hz, C<sub>methine</sub>-CH<sub>3</sub>) ppm. **<sup>13</sup>C{<sup>1</sup>H} NMR** (100.6 MHz, CDCl<sub>3</sub>):  $\delta$  = 219.7 (CS<sub>2</sub>), 149.1 (NCN), 146.5 (*ortho*-CH<sub>aryl</sub>), 131.4 (*para*-CH<sub>aryl</sub>), 130.8 (*ipso*-C<sub>aryl</sub>), 124.6 (*meta*-C<sub>aryl</sub>), 120.6 (CH<sub>backbone</sub>), 29.5 (CH<sub>methine</sub>), 26.0 (CH<sub>3, Dipp</sub>), 22.8 (CH<sub>3, Dipp</sub>) ppm. **CV** ( $\nu$  = 50 mV/s, THF):  $U$  = -2.76 (q. rev., 1e<sup>-</sup>), -2.22 (q. rev., 1e<sup>-</sup>) V.

#### IMes-CS<sub>2</sub> (**1c**)<sup>[1]</sup>

IMes-CS<sub>2</sub> (**1c**) was synthesized according to the general route using 1.0 eq of IMes (622.8 mg, 2.05 mmol) and 2.0 eq of CS<sub>2</sub> (311.5 mg, 247.2  $\mu$ L, 4.09 mmol). **Yield:** 81% (633.0 mg, 1.66 mmol) of a red solid. **<sup>1</sup>H NMR** (400.1 MHz, d<sub>6</sub>-DMSO):  $\delta$  = 7.84 (s, 2H, CH<sub>backbone</sub>), 7.03 (s, 4H, *meta*-CH), 2.28 (s, 6H, *para*-CH<sub>3</sub>), 2.23 (s, 12H, *ortho*-CH<sub>3</sub>) ppm. **<sup>13</sup>C{<sup>1</sup>H} NMR** (100.6 MHz, d<sub>6</sub>-DMSO):  $\delta$  = 221.6 (CS<sub>2</sub>), 146.7 (NCN), 139.8 (C<sub>aryl</sub>), 135.3 (C<sub>aryl</sub>), 131.1 (C<sub>aryl</sub>), 129.0 (*meta*-CH<sub>aryl</sub>), 121.2 (CH<sub>backbone</sub>), 20.5 (*para*-CH<sub>3</sub>), 18.1 (*ortho*-CH<sub>3</sub>) ppm. **CV** ( $\nu$  = 10 mV/s, THF):  $U$  = -2.70 (q. rev., 1e<sup>-</sup>), -2.27 (q. rev., 1e<sup>-</sup>) V.



## Novel Compounds:

### Synthesis of cAAC<sup>Me</sup>-CS<sub>2</sub> (1a)

cAAC<sup>Me</sup>-CS<sub>2</sub> (**1a**) was synthesized according to the general route using using 1.0 eq of cAAC<sup>Me</sup> (3.90 g, 13.7 mmol) in THF (25 mL) and 2.0 eq. of CS<sub>2</sub> (2.08 g, 1.65 mL, 27.3 mmol). Single crystals of the product suitable for X-ray diffraction were grown by evaporation of a saturated solution of the product in dichloromethane. **Yield:** 79% (3.91 g, 10.81 mmol) of a red solid. **Elemental analysis:** C<sub>21</sub>H<sub>31</sub>NS<sub>2</sub> [361.61 g/mol] found (calc.): C 69.69 (69.75), H 8.80 (8.64), N 3.89 (3.87), S 17.89 (17.73)%. **<sup>1</sup>H NMR** (C<sub>6</sub>D<sub>6</sub>, 400.1 MHz):  $\delta$  = 7.04 – 7.00 (m, 1H, CH<sub>aryl</sub>), 6.94 – 6.92 (m, 2H, CH<sub>aryl</sub>), 3.01 (sept, <sup>3</sup>J<sub>H-H</sub> = 6.6 Hz, 2H, CH<sub>methine</sub>), 1.55 (s, 2H, CH<sub>2</sub>), 1.54 (s, 6H, N-C(CH<sub>3</sub>)<sub>2</sub>), 1.45 (d, <sup>3</sup>J<sub>H-H</sub> = 6.6 Hz, 6H, C<sub>methine</sub>-CH<sub>3</sub>), 1.09 (d, <sup>3</sup>J<sub>H-H</sub> = 6.6 Hz, 6H, C<sub>methine</sub>-CH<sub>3</sub>), 0.93 (s, 6H, C-C(CH<sub>3</sub>)<sub>2</sub>) ppm. **<sup>13</sup>C{<sup>1</sup>H} NMR** (C<sub>6</sub>D<sub>6</sub>, 100.6 MHz):  $\delta$  = 226.6 (CS<sub>2</sub>), 187.5 (CCN), 147.1 (C<sub>aryl</sub>), 138.3 (C<sub>aryl</sub>), 130.5 (C<sub>aryl</sub>), 130.0 (C<sub>aryl</sub>), 126.3 (C<sub>aryl</sub>), 125.0 (C<sub>aryl</sub>), 75.6 (N-C(CH<sub>3</sub>)<sub>2</sub>), 50.9 (N-C(CH<sub>3</sub>)<sub>2</sub>), 47.8 (C-(CH<sub>3</sub>)<sub>2</sub>), 33.0 (N-C(CH<sub>3</sub>)<sub>2</sub>), 29.8 (C<sub>methine</sub>), 28.5 (CH<sub>2</sub>), 28.4 (C<sub>methine</sub>-CH<sub>3</sub>), 25.7 (C<sub>methine</sub>-CH<sub>3</sub>) ppm. **UV/VIS/NIR** (C<sub>6</sub>H<sub>6</sub>, 298 K):  $\lambda_{\text{abs}}$  = 306, 381 nm. **IR** (ATR [cm<sup>-1</sup>]):  $\nu$  = 2963 (m), 2923 (w), 2865 (w), 1584 (w), 1527 (s), 1472 (m), 1457 (m), 1388 (m), 1374 (m), 1366 (m), 1345 (m), 1326 (m), 1281 (w), 1210 (w), 1193 (w), 1178 (m), 1148 (m), 1124 (m), 1094 (m), 1075 (m), 1035 (vs), 1019 (s), 979 (m), 960 (m), 948 (m), 809 (m), 772 (s), 731 (m), 715 (w), 698 (s), 602 (m), 564 (m), 542 (m), 485 (m), 436 (m). **CV** ( $v$  = 25 mV/s, THF): -2.30 (q. rev., 1e<sup>-</sup>), -1.90 (q. rev., 1e<sup>-</sup>) V.

### Synthesis of [K(18-crown-6)(cAAC<sup>Me</sup>-CS<sub>2</sub>)] (2a)

KC<sub>8</sub> (18.7 mg, 138.3  $\mu$ mol, 1.0 eq.) and 18-crown-6 (43.9 mg, 165.9  $\mu$ mol, 1.2 eq.) was added to a solution of cAAC<sup>Me</sup>-CS<sub>2</sub> (50.0 mg, 138.3  $\mu$ mol, 1.0 eq.) in THF (5 mL) and ultrasonicated for two hours, then stirred at room temperature for another 18 hours. The mixture was filtered through a pad of celite and the remaining solid and the filter pad were extracted with THF (10 mL). *n*-Hexane (10 mL) was added to the filtrate and the clear solution was placed in a freezer at -30 °C. After two days the precipitate was collected by filtration and washed with *n*-hexane (15 mL) yielding [K(18-crown-6)(cAAC<sup>Me</sup>-CS<sub>2</sub>)] (**2a**) as green needles. Additional material of **2a** may be obtained by further crystallization from the mother liquor. Single crystals of **2a** suitable for X-ray diffraction were obtained by diffusion of *n*-hexane into a saturated solution of the product in THF at -30 °C. **Yield:** 33% (30.0 mg, 45.1  $\mu$ mol). **Elemental analysis:** C<sub>33</sub>H<sub>55</sub>KNO<sub>6</sub>S<sub>2</sub> [665.02 g/mol] found (calc.): C 59.76 (59.60), H 8.24 (8.34), N 2.17 (2.11), S 9.25 (9.64)%. **Magnetic moment** (*Evans'* method, d<sub>8</sub>-THF):  $\mu_{\text{eff}}$  = 1.36  $\mu_{\text{B}}$ . **EPR** (THF, 298 K):  $g_{\text{iso}}$  = 2.013,  $a(^{14}\text{N}, 1\text{N})$  = 11.2 MHz. **UV/VIS/NIR** (THF, 298 K):  $\lambda_{\text{abs}}$  = 791 nm. **IR** (ATR [cm<sup>-1</sup>]):  $\nu$  = 2893 (m), 2863 (m), 1603 (m), 1469 (w), 1453 (w), 1435

(w), 1371 (w), 1350 (m), 1325 (w), 1316 (w), 1283 (w), 1249 (w), 1200 (w), 1104 (vs), 1008 (w), 961 (s), 838 (m), 810 (m), 798 (m), 691 (w), 636 (vw), 607 (vw), 570 (vw), 530 (vw), 479 (vw).

### Synthesis of [K(18-crown-6)(IDipp-CS<sub>2</sub>)] (2b)

KC<sub>8</sub> (23.3 mg, 172.1 μmol, 1.0 eq.) and 18-crown-6 (54.6 mg, 206.6 μmol, 1.2 eq.) was added to a solution of IDipp-CS<sub>2</sub> (80.0 mg, 172.1 μmol, 1.0 eq.) in THF (5 mL) and ultrasonicated for two hours, then stirred at room temperature for another 18 hours. The mixture was filtered through a glass wool filter, *n*-hexane (40 mL) was added to the filtrate and the clear solution was placed in a freezer at −30 °C. After two days the precipitate formed was collected by filtration and washed with *n*-hexane (15 mL) yielding [K(18-crown-6)(IDipp-CS<sub>2</sub>)] (2b) as a dark-blue solid. Additional material of 2b may be obtained by further precipitation from the mother liquor. Single crystals of 2b suitable for X-ray diffraction were obtained by diffusion of *n*-hexane into a saturated solution of the product in THF at −30 °C. **Yield:** 28% (37.5 mg, 48.8 μmol). **Elemental analysis:** C<sub>40</sub>H<sub>60</sub>KN<sub>2</sub>O<sub>6</sub>S<sub>2</sub> [768.15 g/mol] found (calc.): C 62.35 (62.55), H 7.96 (7.96), N 3.69 (3.65), S 8.73 (8.35)%. **Magnetic moment** (Evans' method, d<sub>8</sub>-THF): μ<sub>eff</sub> = 1.11 μ<sub>B</sub>. **EPR** (THF, 298 K): *g*<sub>iso</sub> = 2.011, *a*(<sup>14</sup>N, 2N) = 8.6 MHz. **UV/VIS/NIR** (THF, 298 K): λ<sub>abs</sub> (ε) = 266 (120007), 298 (70582), 364 (92139), 601 (17899) nm (Lmol<sup>-1</sup>cm<sup>-1</sup>). **IR** (ATR [cm<sup>-1</sup>]): ν = 3063 (vw), 2958 (m), 2896 (m), 2864 (m), 2824 (vw), 1639 (vw), 1574 (vw), 1557 (vw), 1466 (m), 1451 (m), 1398 (w), 1383 (w), 1350 (m); 1330 (w), 1282 (w), 1248 (w), 1206 (w), 1105 (vs), 1058 (s), 996 (w), 963 (s), 943 (s), 920 (s), 858 (m), 792 (m), 750 (m), 726 (m), 704 (m), 642 (w), 551 (vw), 551 (w), 531 (w), 495 (w), 469 (w).

### Synthesis of [K(18-crown-6)(IMes-CS<sub>2</sub>)] (2c)

KC<sub>8</sub> (35.5 mg, 262.7 μmol, 1.0 eq.) and 18-crown-6 (69.5 mg, 262.8 μmol, 1.0 eq.) was added to a suspension of IMes-CS<sub>2</sub> (100.0 mg, 262.8 μmol, 1.0 eq.) in THF (10 mL). The mixture was stirred at room temperature for 48 hours and the purple solution was separated from undissolved solids by filtration through a glass wool filter. The residual solids were extracted with THF (3 x 10 mL) and the combined THF-fractions were reduced to approximately 30% of their volume by evaporation *in vacuo*. *n*-Hexane was added (10 mL) and the precipitate was collected by filtration and washed with *n*-hexane (3 x 5 mL) to yield [K(18-crown-6)(IMes-CS<sub>2</sub>)] (2c) as a purple solid. Single crystals of 2c suitable for X-ray diffraction were obtained by slow evaporation of a saturated solution of the product in MeCN at −30 °C. **Yield:** 42% (76.0 mg, 111.1 μmol). **Elemental analysis:** C<sub>40</sub>H<sub>60</sub>KN<sub>2</sub>O<sub>6</sub>S<sub>2</sub> [768.15 g/mol] found (calc.): C 57.40 (57.71), H 7.69 (7.07), N 3.16 (4.10), S 6.52 (9.37)%. **Magnetic moment** (Evans'

method,  $d_8$ -THF):  $\mu_{\text{eff}} = 1.07 \mu_{\text{B}}$ . **EPR** (MeCN, 298 K):  $g_{\text{iso}} = 2.011$ ,  $a(^{14}\text{N}, 2\text{N}) = 7.9 \text{ MHz}$  (2.8 G). **UV/VIS/NIR** (MeCN, 298 K):  $\lambda_{\text{abs}} = 566 \text{ nm}$ . **IR** (ATR [ $\text{cm}^{-1}$ ]):  $\nu = 2879 \text{ (m)}$ ,  $2860 \text{ (m)}$ ,  $2743 \text{ (vw)}$ ,  $1602 \text{ (m)}$ ,  $1570 \text{ (m)}$ ,  $1487 \text{ (m)}$ ,  $1472 \text{ (m)}$ ,  $1459 \text{ (m)}$ ,  $1379 \text{ (w)}$ ,  $1350 \text{ (m)}$ ,  $1284 \text{ (w)}$ ,  $1250 \text{ (m)}$ ,  $1223 \text{ (w)}$ ,  $1101 \text{ (vs)}$ ,  $1051 \text{ (s)}$ ,  $992 \text{ (m)}$ ,  $962 \text{ (s)}$ ,  $930 \text{ (m)}$ ,  $838 \text{ (s)}$ ,  $755 \text{ (w)}$ ,  $724 \text{ (w)}$ ,  $689 \text{ (w)}$ ,  $573 \text{ (w)}$ ,  $530 \text{ (w)}$ ,  $486 \text{ (w)}$ ,  $413 \text{ (w)}$ .

### Synthesis of $[\text{Mg}^{\text{DippNacNac}}(\text{cAAC}^{\text{Me}}\text{-CS}_2)] \text{ (3)}$

A solution of  $\text{cAAC}^{\text{Me}}\text{-CS}_2$  (100.0 mg,  $276.5 \mu\text{mol}$ , 2.0 eq.) in THF (5 mL) was added to a solution of  $[\text{Mg}^{\text{DippNacNac}}]_2$  (122.2 mg,  $138.3 \mu\text{mol}$ , 1.0 eq.) in THF (5 mL) and stirred at room temperature for 18 hours. The solvent was removed *in vacuo* and the residue was extracted with *n*-hexane (15 mL) and separated from undissolved solids *via* filtration through a pad of celite. The filtrate was slowly evaporated at room temperature yielding  $[\text{Mg}^{\text{DippNacNac}}(\text{cAAC}^{\text{Me}}\text{-CS}_2)] \text{ (3)}$  as a green crystalline solid. The single crystals obtained this way were suitable for X-ray diffraction. **Yield:** 42% (93.0 mg,  $115.7 \mu\text{mol}$ ). **Elemental analysis:**  $\text{C}_{50}\text{H}_{72}\text{MgN}_3\text{S}_2$  [803.57 g/mol] found (calc.): C 74.08 (74.74), H 9.35 (9.03), N 5.24 (5.23), S 5.33 (7.98)%. **Magnetic moment** (*Evans'* method,  $\text{C}_6\text{D}_6$ ):  $\mu_{\text{eff}} = 1.20 \mu_{\text{B}}$ . **EPR** ( $\text{C}_6\text{H}_6$ , 298 K):  $g_{\text{iso}} = 2.009$ ,  $a(^{14}\text{N}, 1\text{N}) = 15.0 \text{ MHz}$ . **UV/VIS/NIR** ( $\text{C}_6\text{H}_6$ , 298 K):  $\lambda_{\text{abs}} = 680 \text{ nm}$ . **IR** (ATR [ $\text{cm}^{-1}$ ]):  $\nu = 3058 \text{ (w)}$ ,  $2959 \text{ (s)}$ ,  $2926 \text{ (m)}$ ,  $2866 \text{ (m)}$ ,  $1660 \text{ (m)}$ ,  $1623 \text{ (w)}$ ,  $1590 \text{ (w)}$ ,  $1546 \text{ (m)}$ ,  $1516 \text{ (m)}$ ,  $1457 \text{ (s)}$ ,  $1434 \text{ (s)}$ ,  $1400 \text{ (vs)}$ ,  $1362 \text{ (s)}$ ,  $1327 \text{ (s)}$ ,  $1314 \text{ (vs)}$ ,  $1254 \text{ (m)}$ ,  $1201 \text{ (m)}$ ,  $1173 \text{ (m)}$ ,  $1130 \text{ (w)}$ ,  $1101 \text{ (m)}$ ,  $1054 \text{ (m)}$ ,  $1040 \text{ (m)}$ ,  $1018 \text{ (s)}$ ,  $933 \text{ (m)}$ ,  $921 \text{ (m)}$ ,  $891 \text{ (w)}$ ,  $851 \text{ (w)}$ ,  $791 \text{ (s)}$ ,  $756 \text{ (s)}$ ,  $696 \text{ (w)}$ ,  $629 \text{ (vw)}$ ,  $577 \text{ (w)}$ ,  $521 \text{ (w)}$ ,  $437 \text{ (m)}$ ,  $406 \text{ (m)}$ .

### 3 NMR Section

#### 3.1 General Information

NMR spectra were recorded at 298 K using a Bruker Avance 400 ( $^1\text{H}$ , 400.1 MHz;  $^{13}\text{C}$ , 100.6 MHz) spectrometer. Chemical shifts ( $\delta$ ) are listed in parts per million (ppm) and were referenced *via* residual proton resonances of the deuterated solvent ( $\text{C}_6\text{D}_6$ : 7.16 ppm;  $\text{CDCl}_3$ : 7.26 ppm;  $\text{d}_8$ -THF: 1.72 ppm, 3.58 ppm;  $\text{d}_6$ -DMSO: 2.50 ppm), whereas  $^{13}\text{C}\{^1\text{H}\}$  NMR spectra are reported relative to TMS using the natural-abundance carbon resonances ( $\text{C}_6\text{D}_6$ : 128.06 ppm;  $\text{CDCl}_3$ : 77.16 ppm;  $\text{d}_8$ -THF: 67.21 ppm, 25.31 ppm;  $\text{d}_6$ -DMSO: 39.52 ppm).<sup>[9]</sup> Spectra were plotted using the Mestre Nova software package.<sup>[10]</sup>

#### 3.2 NMR Spectra

##### $\text{cAAC}^{\text{Me}}\text{-CS}_2$ (**1a**)

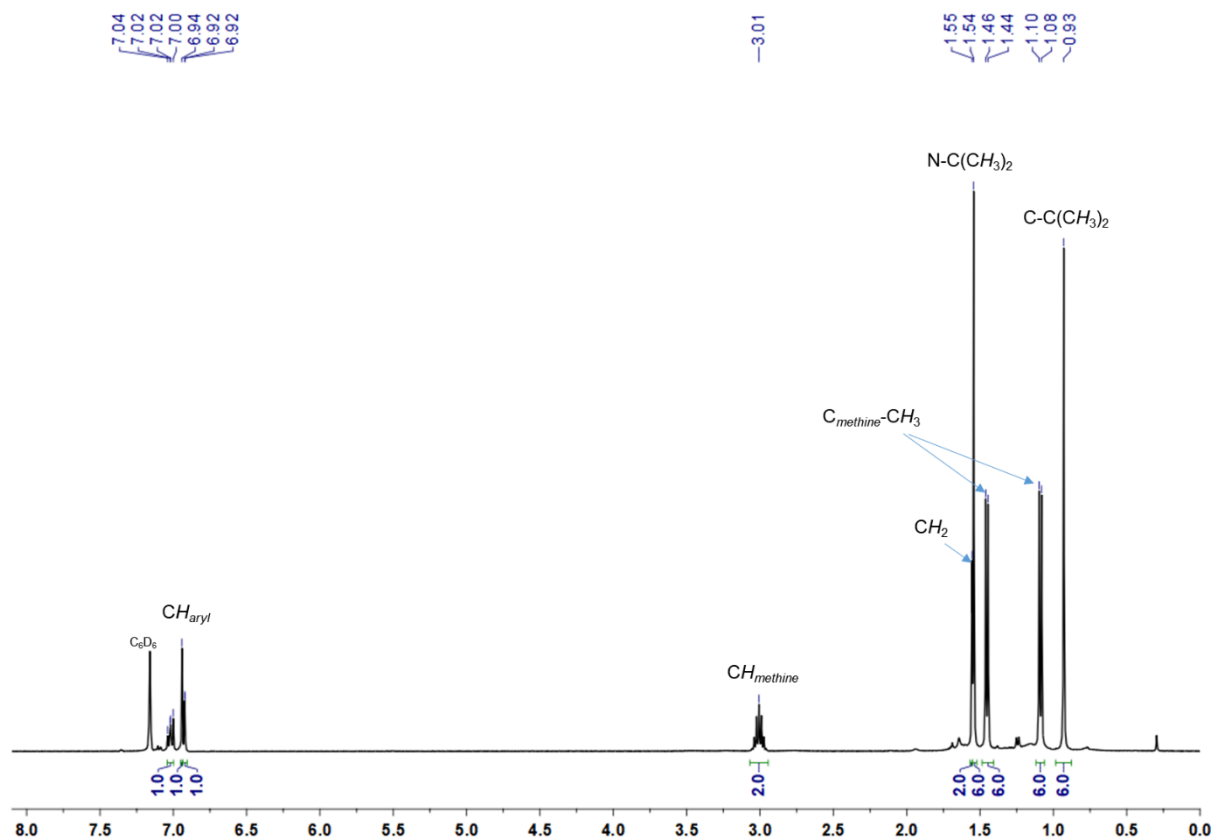

**Figure S4.**  $^1\text{H}$  NMR spectrum of  $\text{cAAC}^{\text{Me}}\text{-CS}_2$  (**1a**) in  $\text{C}_6\text{D}_6$ .

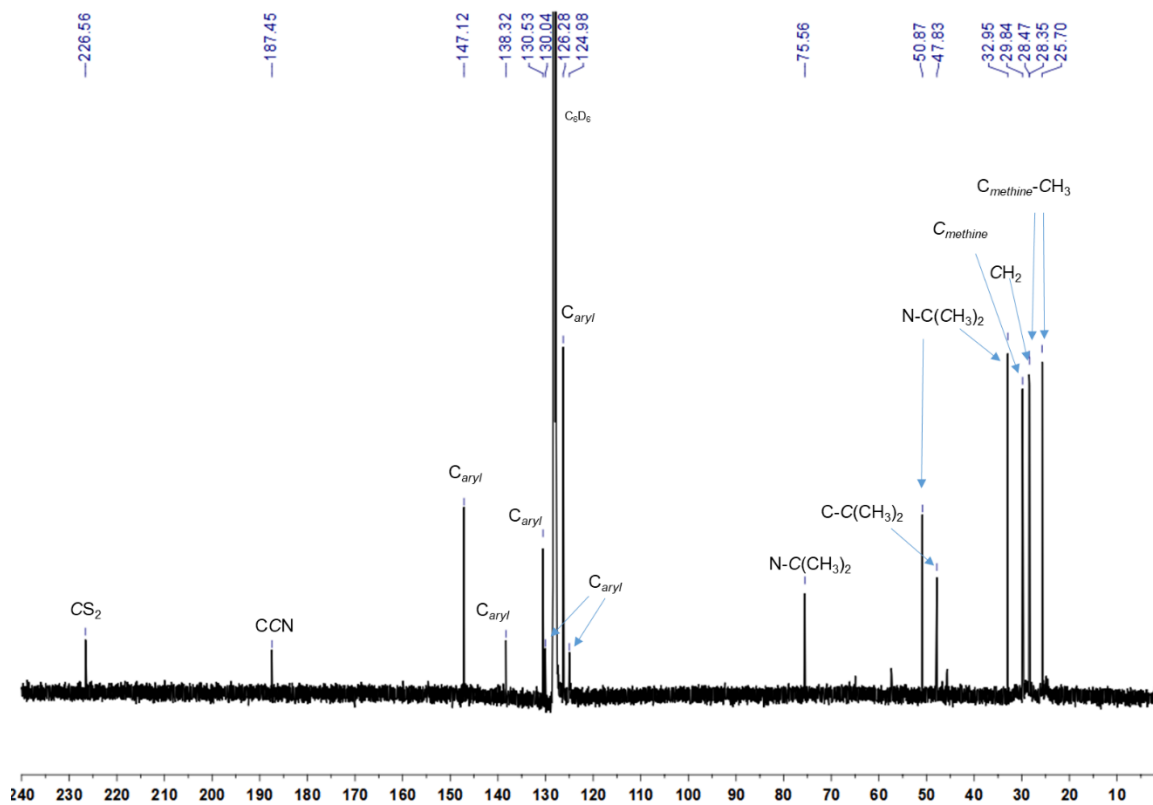

**Figure S5.**  $^{13}\text{C}\{^1\text{H}\}$  NMR spectrum of  $\text{cAAC}^{\text{Me}}\text{-CS}_2$  (**1a**) in  $\text{C}_6\text{D}_6$ .

## 4 EPR Section

### 4.1 General Information

EPR measurements at X-band (9.38 GHz) were carried out using a Bruker ELEXSYS E580 CW EPR spectrometer equipped with an Oxford Instruments helium cryostat (ESR900) and a MercuryTC temperature controller. The spectral simulations were performed using MATLAB 9.14.0.2206163 (R2023a) and the EasySpin 5.2.35 toolbox.<sup>[11]</sup>

### 4.2 EPR Spectra

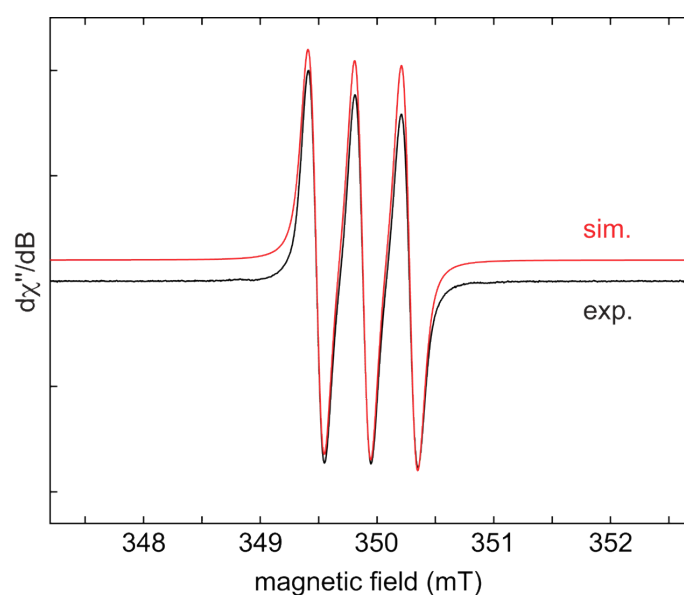

**Figure S6.** Experimental (black) and simulated (red) X-band EPR spectra of [K(18-crown-6)(cAAC<sup>Me</sup>-CS<sub>2</sub>)] (**2a**) in THF solution at room temperature. The EPR simulation involves an isotropic  $g$  factor of 2.013 and a nitrogen hyperfine coupling of  $a(^{14}\text{N}) = 11.2$  MHz (4.0 G).

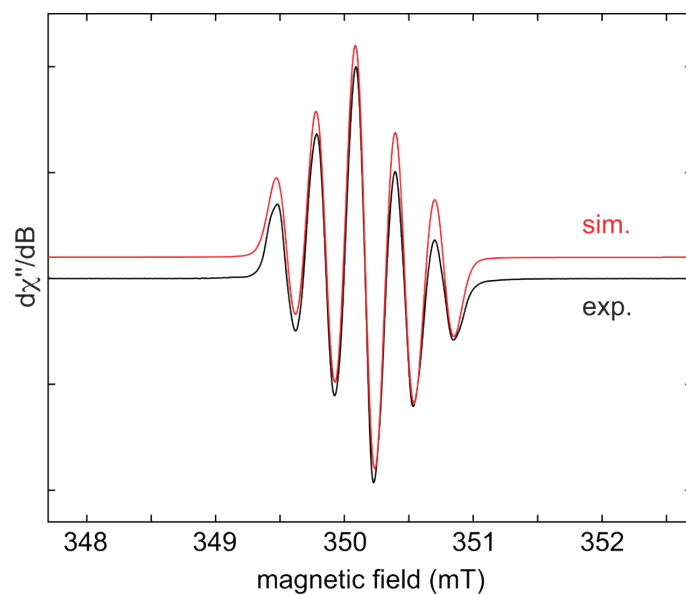

**Figure S7.** Experimental (black) and simulated (red) X-band EPR spectra of [K(18-crown-6)(IDipp-CS<sub>2</sub>)] (**2b**) in THF solution at room temperature. The EPR simulation involves an isotropic  $g$  factor of 2.011 and a nitrogen hyperfine coupling of  $a(^{14}\text{N}, 2\text{N}) = 8.6$  MHz (3.05 G).

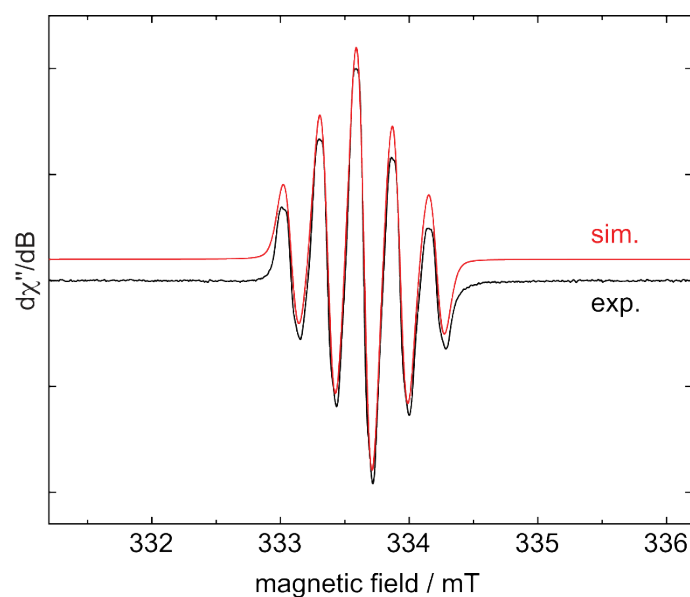

**Figure S8.** Experimental (black) and simulated (red) X-band EPR spectra of [K(18-crown-6)(IMes-CS<sub>2</sub>)] (**2c**) in acetonitrile solution at room temperature. The EPR simulation involves an isotropic  $g$  factor of 2.011 and a nitrogen hyperfine coupling of  $a(^{14}\text{N}, 2\text{N}) = 7.9$  MHz (2.8 G).

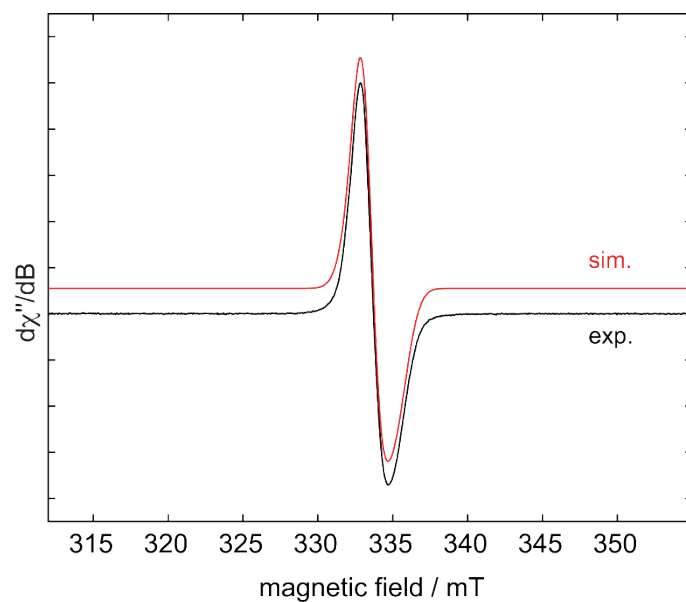

**Figure S9.** Experimental (black) and simulated (red) X-band EPR spectra of [K(18-crown-6)(IMes-CS<sub>2</sub>)] (**2c**) in frozen acetonitrile solution at 70 K. The best-fit simulation parameters are:  $g_1 = 2.0136$ ,  $g_2 = 2.0123$ , and  $g_3 = 2.0042$  (average:  $g_{\text{iso}} = 2.0100$ ).

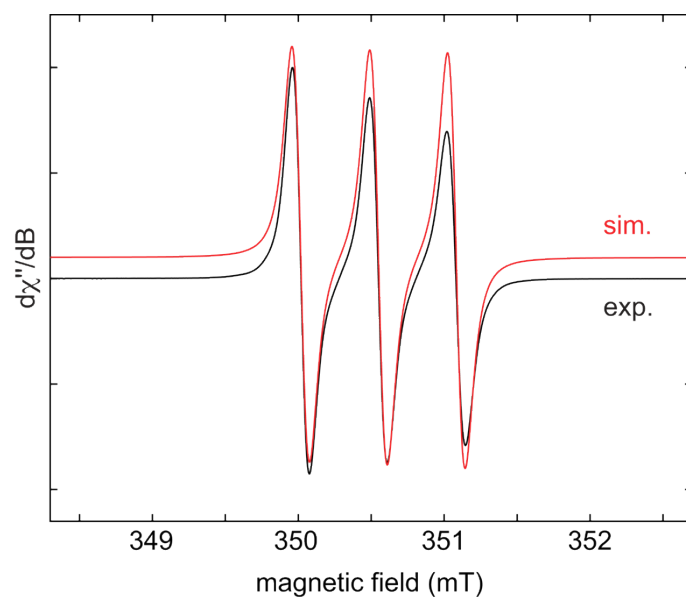

**Figure S10.** Experimental (black) and simulated (red) X-band EPR spectra of [Mg(DippNacNac)(cAACMe-CS<sub>2</sub>)] (**3**) in benzene solution at room temperature. The EPR simulation involves an isotropic  $g$  factor of 2.009 and a nitrogen hyperfine coupling of  $a(^{14}\text{N}) = 15.0$  MHz (5.3 G).



## 5 IR Section

### 5.1 General Information

Infrared spectra were recorded on a Bruker Alpha or Alpha II spectrometer as solids by using an ATR unit and plotted using the OPUS software package.<sup>[12]</sup>

### 5.2 IR Spectra

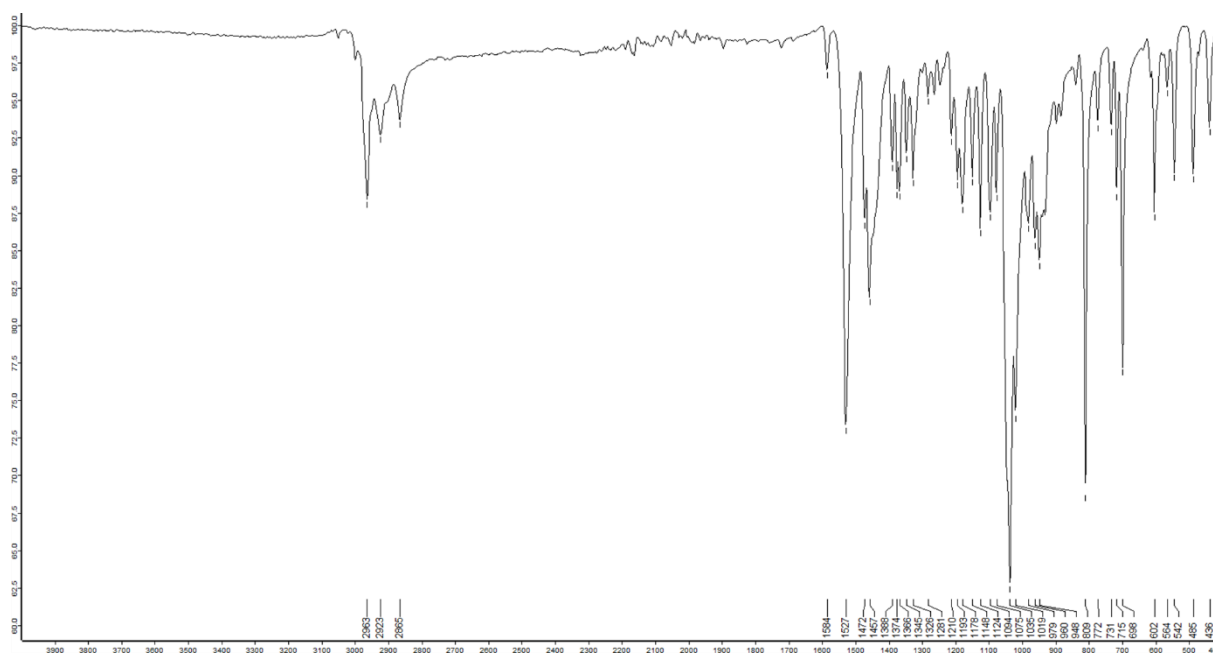

Figure S11. FT-IR spectrum (ATR) of cAAC<sup>Me</sup>-CS<sub>2</sub> (**1a**).

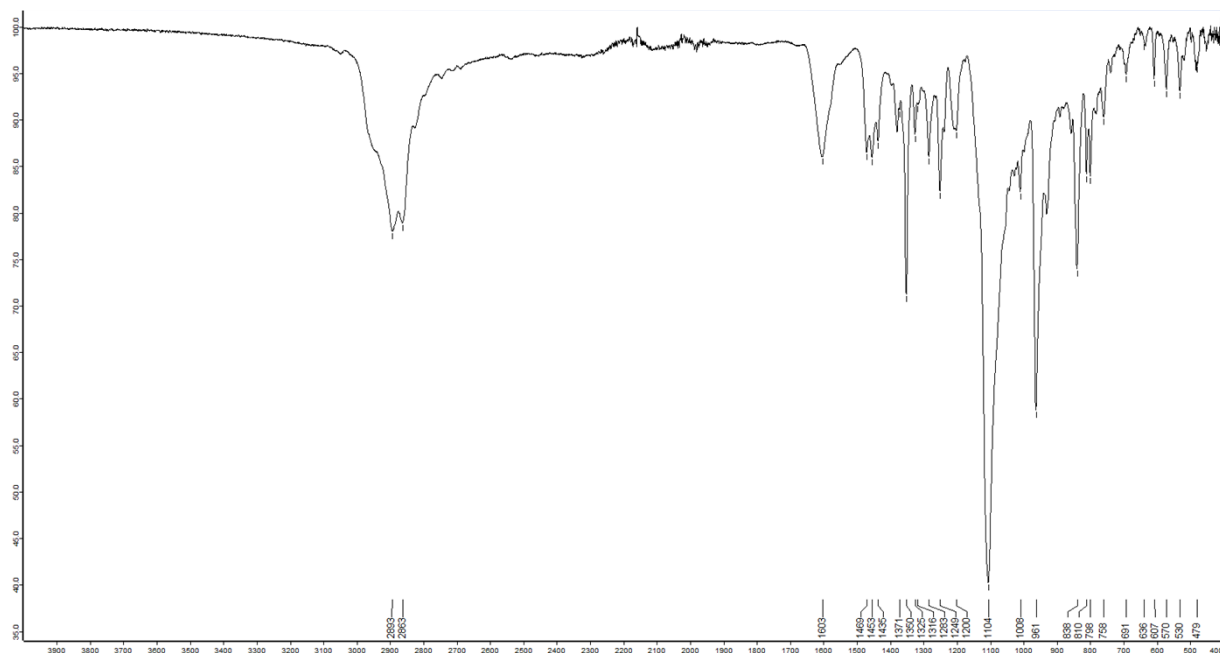

**Figure S12.** FT-IR spectrum (ATR) of [K(18-crown-6)(cAAC<sup>Me</sup>-CS<sub>2</sub>)] (**2a**).

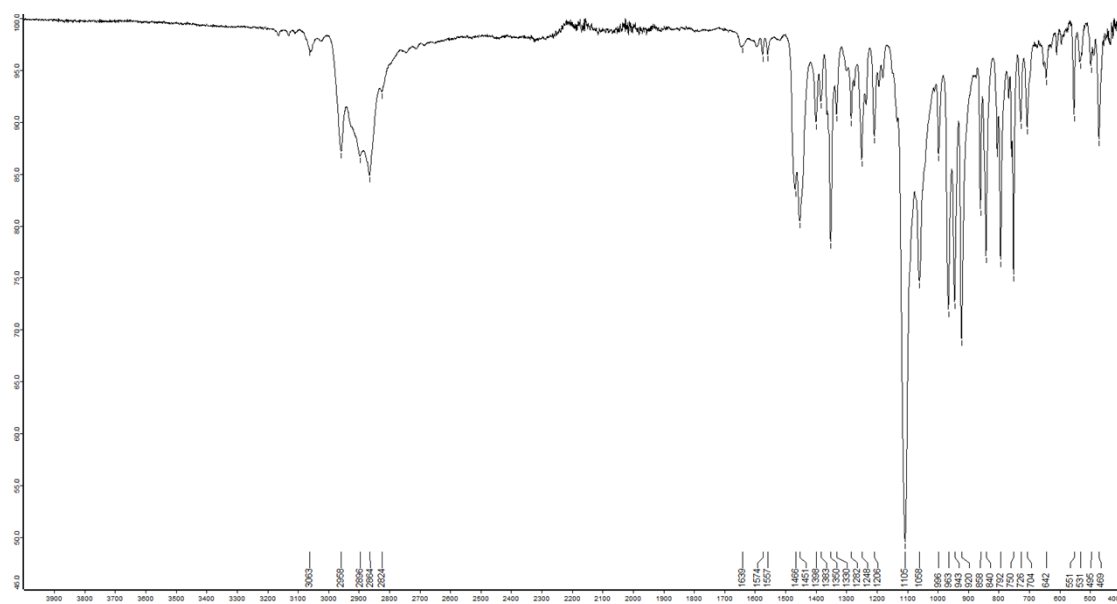

**Figure S13.** FT-IR spectrum (ATR) of [K(18-crown-6)(IDipp-CS<sub>2</sub>)] (**2b**).

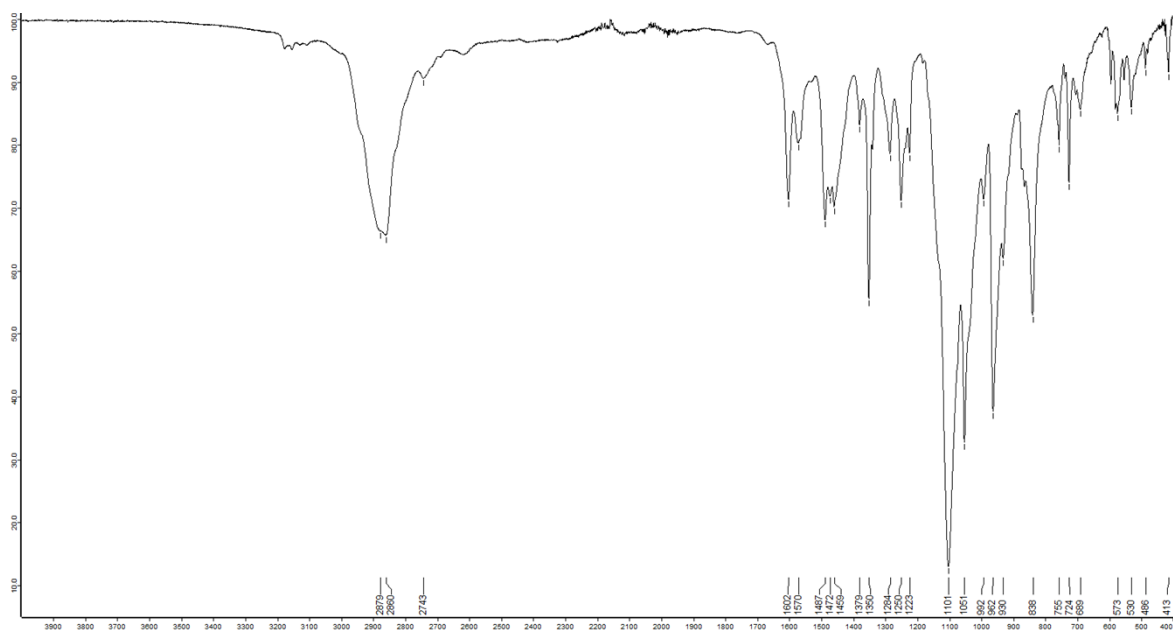

**Figure S14.** FT-IR spectrum (ATR) of [K(18-crown-6)(IMes-CS<sub>2</sub>)] (**2c**).

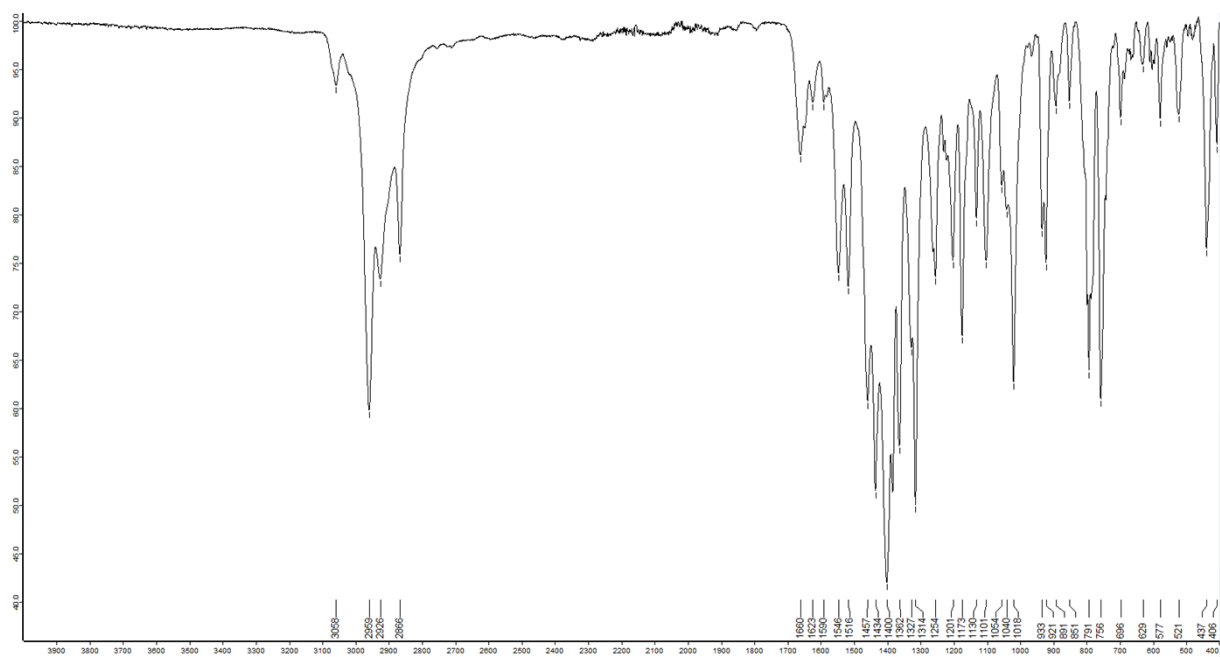

**Figure S15.** FT-IR spectrum (ATR) of [Mg(DippNacNac)(cAAC<sup>Me</sup>-CS<sub>2</sub>)] (**3**).

## 6 Electrochemical Section

### 6.1 General Information

Cyclic voltammetry experiments were performed using a PINE Instruments AFCEBP1 bipotentiostat or a Metrohm PGSTAT30 potentiostat with commercially available cells (ALS Co. Ltd., VC-4) in argon filled gloveboxes. The cells were used with a glassy carbon disc working electrode (2 mm diameter, BaSi) and a commercial platinum wire counter electrode (0.4 mm x 5.7 mm, ALS Co. Ltd.), as well as commercial silver wire reference electrodes separated from the main compartment by ion permeable porous glass (RE-7, ALS Co. Ltd.) and filled with a 0.01 M AgNO<sub>3</sub> stock solution in acetonitrile. Cyclovoltammetric measurements were performed with argon purged solvents. [TBA][PF<sub>6</sub>] was obtained from Fluka (98%+) and used without further purification. All measurements were referenced against Ag<sup>+</sup>/Ag as well as [Fe(Cp)<sub>2</sub>]<sup>+</sup>/[Fe(Cp)<sub>2</sub>] as an internal standard by addition of [FeCp<sub>2</sub>] at the end of the CV-experiment. The experiment control and recording were performed using the software packages AfterMath<sup>[13]</sup> or Nova<sup>[14]</sup>, and data processing and plots were done with Origin 2023.<sup>[15]</sup>

### 6.2 Cyclovoltammograms

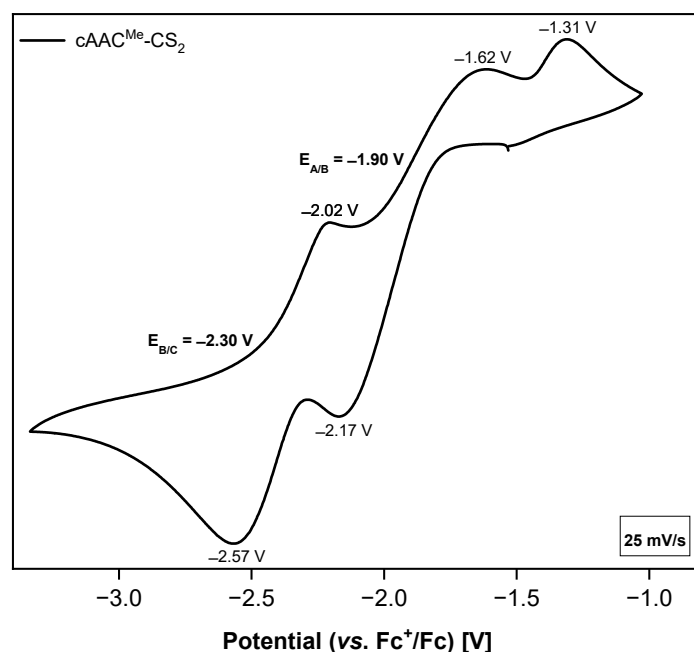

**Figure S16.** Cyclic voltammogram of cAAC<sup>Me</sup>-CS<sub>2</sub> (**1a**) in THF using 0.1 M [TBA][PF<sub>6</sub>] as supporting electrolyte at a scan rate of 25 mV/s. Potentials are referenced to the ferrocene/ferrocenium couple and the current is normalized to a value of 1.

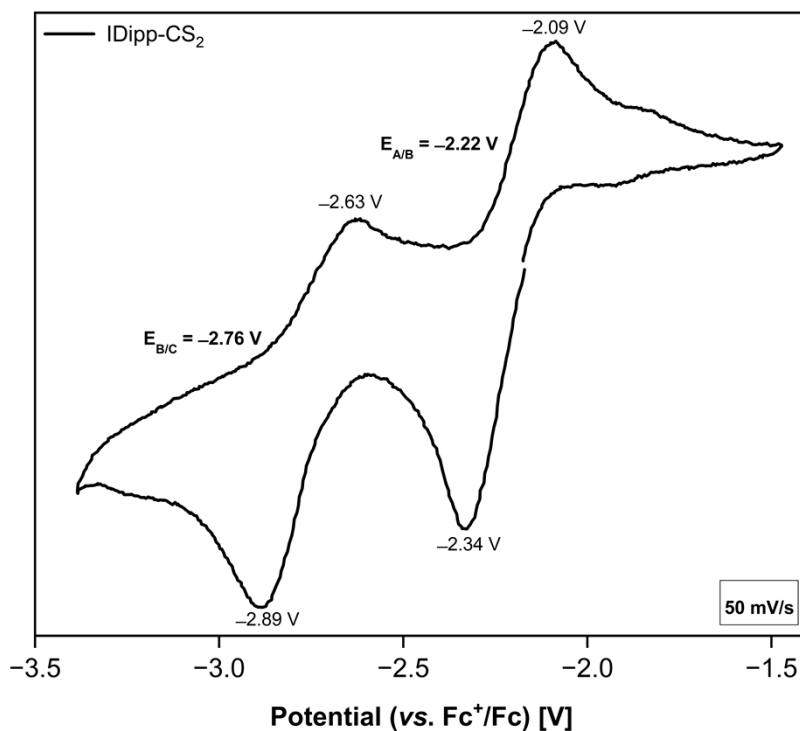

**Figure S17.** Cyclic voltammogram of IDipp-CS<sub>2</sub> (1b) in THF using 0.1 M [TBA][PF<sub>6</sub>] as supporting electrolyte at a scan rate of 50 mV/s. Potentials are referenced to the ferrocene/ferrocenium redox couple and the current is normalized to a value of 1.

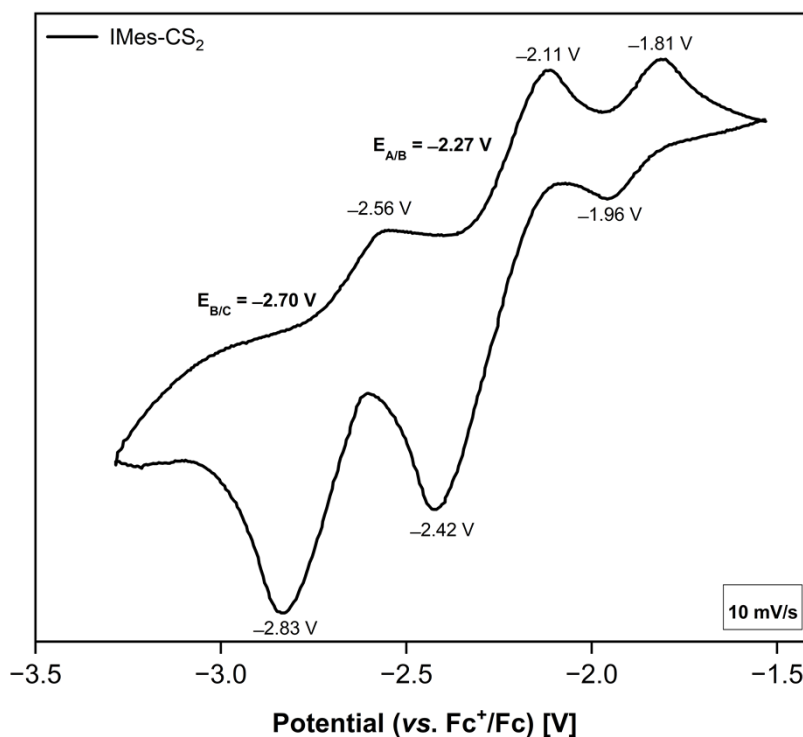

**Figure S18.** Cyclic voltammogram of IMes-CS<sub>2</sub> (1c) in THF using 0.1 M [TBA][PF<sub>6</sub>] as supporting electrolyte at a scan rate of 10 mV/s. Potentials are referenced to the ferrocene/ferrocenium redox couple and the current is normalized to a value of 1.

## 7 UV/VIS/NIR Section

### 7.1 General Information

All measurements were performed in standard quartz cuvettes (1 cm x 1 cm cross-section) attached with a J. Young stopper under an argon atmosphere. Absorption spectra were recorded using a Perkin Elmer Lambda 465 or a Perkin Elmer Lambda 1050+ spectrophotometer. In the cases of **2a**, **2b** and **3**, rapid decomposition of the compounds forming the neutral adducts took place at low concentrations necessary for UV/VIS/NIR spectroscopy. Measurements were therefore performed in high concentrations with only the wavelength sections measured, in which the absorptions due to the radical characters of the coloured products were detected (450–1000 nm). Therefore, due to too high optical density at wavelengths below this range as well as overlapping with the decomposition products, absorptions thereof were not considered. Spectra were plotted using the Origin software package.<sup>[15]</sup>

### 7.2 UV/VIS/NIR Spectra

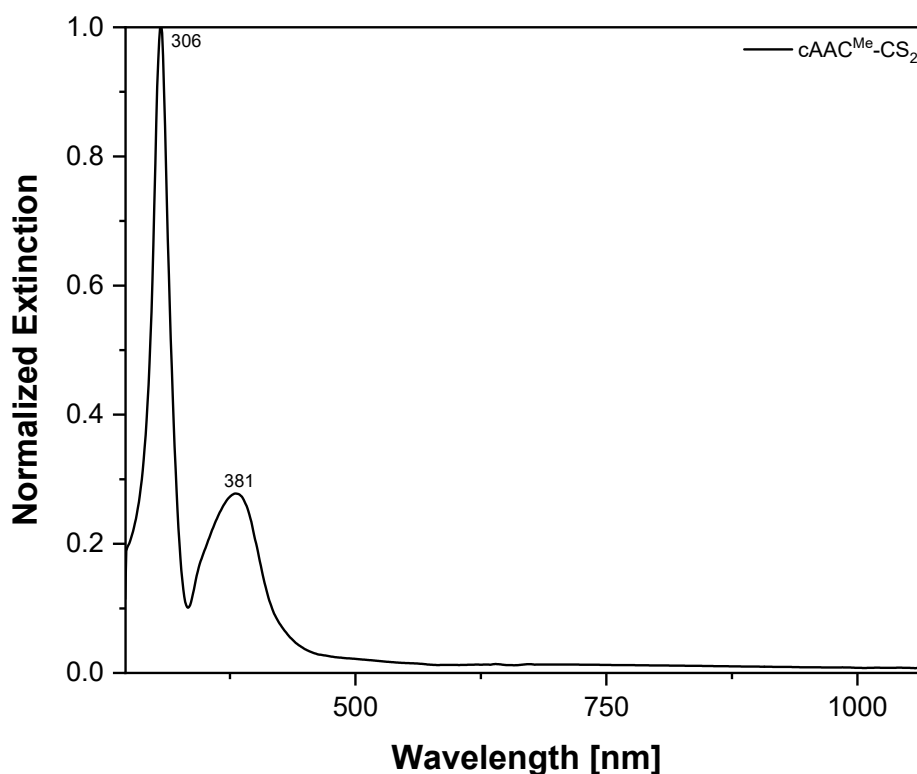

**Figure S19.** Absorption spectrum of cAAC<sup>Me</sup>-CS<sub>2</sub> (**1a**) in benzene.

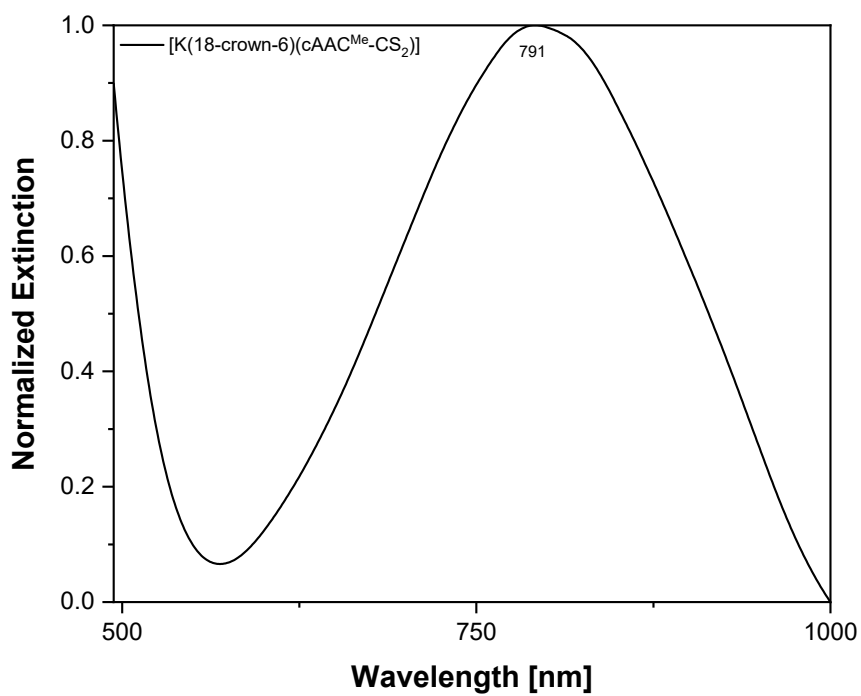

**Figure S20.** Absorption spectrum of [K(18-crown-6)(cAAC<sup>Me</sup>-CS<sub>2</sub>)] (2a) in benzene.

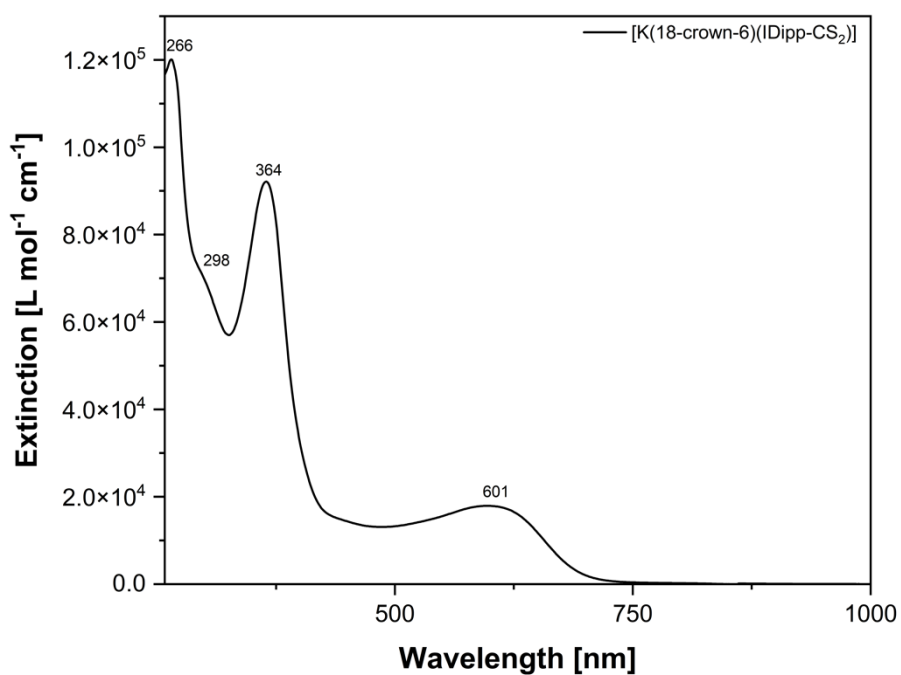

**Figure S21.** Absorption spectrum of [K(18-crown-6)(IDipp-CS<sub>2</sub>)] (2b) in THF.

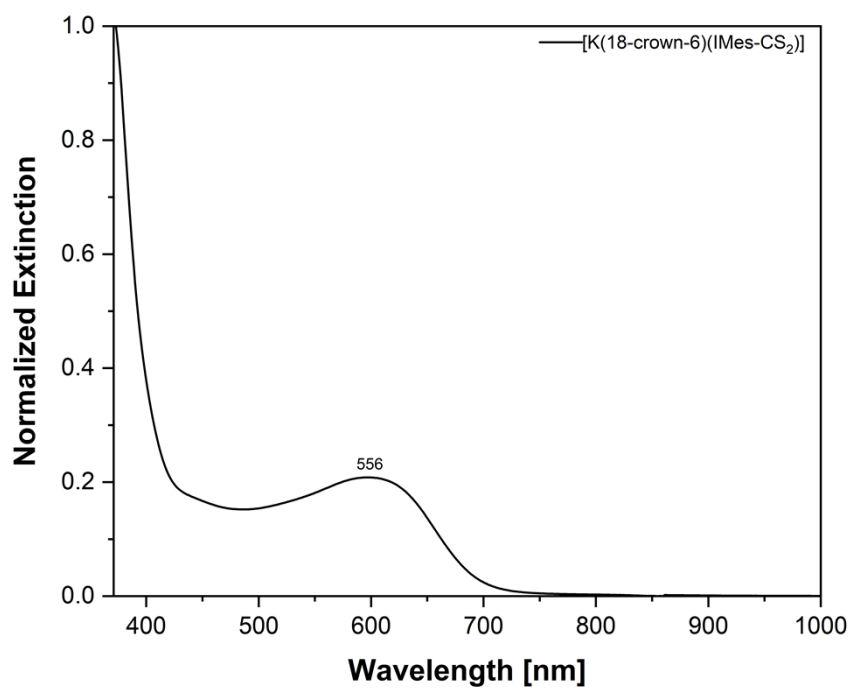

Figure S22. Absorption spectrum of  $[K(18\text{-crown-6})(\text{IMes-CS}_2)]$  (**2c**) in MeCN.

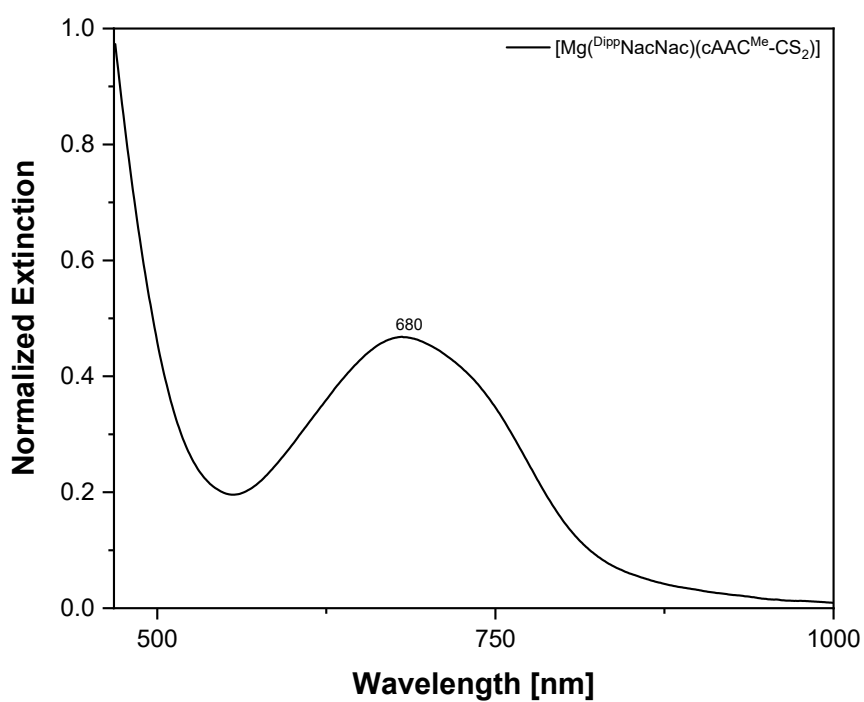

Figure S23. Absorption spectrum of  $[Mg(\text{DippNacNac})(\text{cAAC}^{\text{Me}}\text{-CS}_2)]$  (**3**) in benzene.



## 8 Crystallographic Section

### 8.1 General Information

Crystal data were either collected on a Rigaku XtaLAB Synergy-DW diffractometer with an HyPix-6000HE detector and monochromated CuK $\alpha$  or MoK $\alpha$  radiation equipped with an Oxford Cryo 800 cooling unit or on a XtaLAB Synergy Dualflex HyPix diffractometer with a Hybrid Pixel array detector and multi-layer mirror monochromated CuK $\alpha$  radiation. The Crystals were immersed in a film of perfluoropoly-ether oil on a glass fiber MicroMount™ (MiTeGen) and data were collected at 100 K. The images were processed with the Bruker or CrysAlis software packages and equivalent reflections were merged. Corrections for Lorentz-polarization effects and absorption were performed if necessary and the structures were solved by direct methods. Subsequent difference Fourier syntheses revealed the positions of all other non-hydrogen atoms. The structures were solved by using the ShelXTL software package.<sup>[16]</sup> All non-hydrogen atoms were refined anisotropically. Hydrogen atoms were assigned to idealized positions and were included in structure factor calculations. Figures are created using Diamond Crystal and Molecular Structure Visualisation software.<sup>[17]</sup>

Crystallographic data for the structures reported in this paper have been deposited with the Cambridge Crystallographic Data Centre as supplementary publication no.s CCDC 2390729 (**1a**), CCDC 2390730 (**3**), CCDC 2390731 (**2c**), CCDC 2390732 (**2b**), and CCDC 2390733 (**2a(THF)**). Copies of the data can be obtained free of charge on application to CCDC (<https://www.ccdc.cam.ac.uk>).

## 8.2 Crystal Data

### Crystal Data for cAAC<sup>Me</sup>-CS<sub>2</sub> (1a):

C<sub>21</sub>H<sub>31</sub>NS<sub>2</sub>,  $M_r = 361.61$  g/mol,  $T = 100.00(10)$  K,  $\lambda = 1.54184$  Å, orange block,  $0.160 \times 0.140 \times 0.070$  mm<sup>3</sup>, monoclinic, space group  $P2_1$ ,  $a = 8.0364(2)$  Å,  $b = 14.9846(4)$  Å,  $c = 8.9999(3)$  Å,  $\alpha = 90^\circ$ ,  $\beta = 113.047(3)^\circ$ ,  $\gamma = 90^\circ$ ,  $V = 997.28(5)$  Å<sup>3</sup>,  $Z = 2$ ,  $\rho_{\text{calc}} = 1.204$  Mg/m<sup>3</sup>,  $\mu = 2.409$  mm<sup>-1</sup>,  $F(000) = 392$ , 7881 reflections,  $-9 \leq h \leq 10$ ,  $-18 \leq k \leq 16$ ,  $-11 \leq l \leq 7$ ,  $5.341^\circ < \theta < 77.647^\circ$ , completeness 97.6%, 3373 independent reflections, 3324 reflections observed with  $[I > 2\sigma(I)]$ , 225 parameters, 1 restraint,  $R$  indices (all data)  $R_1 = 0.0337$ ,  $wR_2 = 0.0884$ , final  $R$  indices  $[I > 2\sigma(I)]$   $R_1 = 0.0334$ ,  $wR_2 = 0.0881$ , largest difference peak and hole 0.335 and  $-0.274$  e Å<sup>-3</sup>, Goof = 1.041.

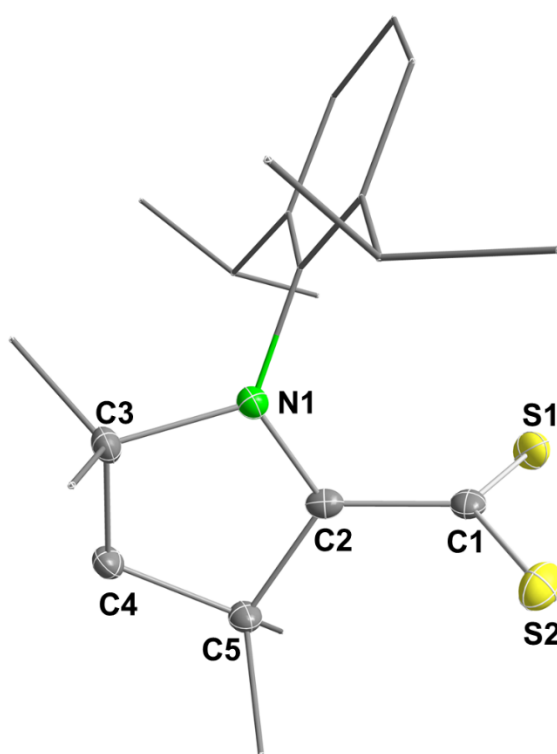

**Figure S24.** Molecular structure of cAAC<sup>Me</sup>-CS<sub>2</sub> (1a) in the solid-state (ellipsoids set at 50% probability level). The hydrogen atoms are omitted for clarity. Selected bond lengths [Å] and angles [°]: S1–C1 1.653(3), S2–C1 1.681(3), C1–C2 1.485(3), C2–C5 1.523(3), C2–N1 1.307(3), N1–C3 1.540(3), C3–C4 1.523(4), C4–C5 1.553(3),  $\angle$ S1C1S2 131.0(1),  $\angle$ N1C2C1S1 83.7(3).

**Crystal Data for [K(THF)(18-crown-6)(cAAC<sup>Me</sup>-CS<sub>2</sub>)] (2a):**

C<sub>37</sub>H<sub>63</sub>KNO<sub>7</sub>S<sub>2</sub>,  $M_r = 737.10$  g/mol,  $T = 100.00(10)$  K,  $\lambda = 1.54184$  Å, green block,  $0.130 \times 0.090 \times 0.060$  mm<sup>3</sup>, monoclinic, space group  $P2_1/n$ ,  $a = 17.1497(2)$  Å,  $b = 10.44560(10)$  Å,  $c = 23.0760(2)$  Å,  $\alpha = 90^\circ$ ,  $\beta = 100.7780(10)^\circ$ ,  $\gamma = 90^\circ$ ,  $V = 4060.89(7)$  Å<sup>3</sup>,  $Z = 4$ ,  $\rho_{calc} = 1.206$  Mg/m<sup>3</sup>,  $\mu = 2.459$  mm<sup>-1</sup>,  $F(000) = 1596$ , 39466 reflections,  $-20 \leq h \leq 21$ ,  $-13 \leq k \leq 12$ ,  $-29 \leq l \leq 27$ ,  $2.961^\circ < \theta < 77.468^\circ$ , completeness 99.3%, 8338 independent reflections, 7283 reflections observed with  $[I > 2\sigma(I)]$ , 487 parameters, 214 restraints,  $R$  indices (all data)  $R_1 = 0.0661$ ,  $wR_2 = 0.1659$ , final  $R$  indices  $[I > 2\sigma(I)]$   $R_1 = 0.0594$ ,  $wR_2 = 0.1609$ , largest difference peak and hole 1.212 and  $-1.210$  e Å<sup>-3</sup>,  $Goof = 1.039$ .

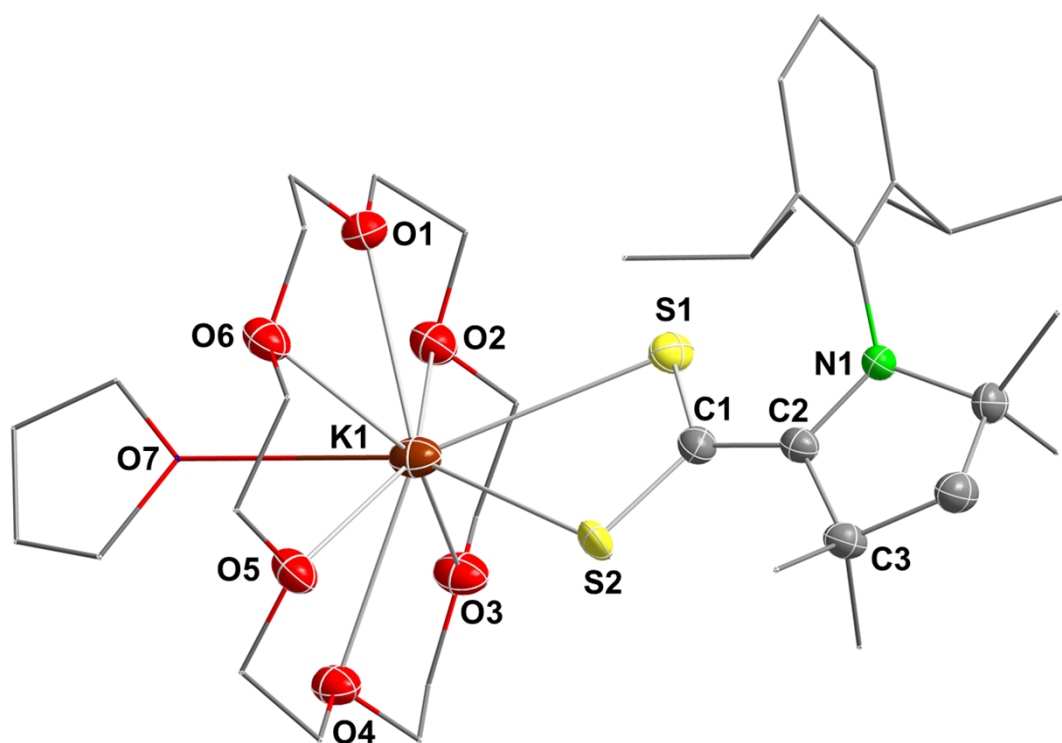

**Figure S25.** Molecular structure of [K(THF)(18-crown-6)(cAAC<sup>Me</sup>-CS<sub>2</sub>)] (**2a**): in the solid-state (ellipsoids set at 50% probability level). The hydrogen atoms are omitted for clarity. As the structure contained a two-fold disorder (43:57) of the THF molecules only the part of 57% occupancy is shown. Selected bond lengths [Å] and angles [°]: S1–K1 3.116(1), S2–K1 3.351(1), K1–O1 2.831(2), K1–O2 2.966(2), K1–O3 2.829(2), K1–O4 2.946(2), K1–O5 2.784(2), K1–O6 2.946(2), K1–O7 3.320(5), S1–C1 1.728(2), S2–C1 1.723(3), C1–C2 1.410(3), C2–N1 1.393(3),  $\angle$ S1C1S2 117.9(1),  $\angle$ N1C2C1S1 10.9(3).

**Crystal Data for [K(18-crown-6)(IDipp-CS<sub>2</sub>)]·(18-crown-6) (**2b**·18-crown-6):**

C<sub>50.3</sub>H<sub>80.86</sub>K<sub>0.87</sub>N<sub>2</sub>O<sub>11.21</sub>S<sub>2</sub>, *M<sub>r</sub>* = 992.69 g/mol, *T* = 100.00(10) K,  $\lambda$  = 1.54184 Å, black plate, 0.280 × 0.180 × 0.080 mm<sup>3</sup>, triclinic, space group *P* $\bar{1}$ , *a* = 12.4442(3) Å, *b* = 12.7336(4) Å, *c* = 18.2742(6) Å,  $\alpha$  = 89.060(2)°,  $\beta$  = 78.915(2)°,  $\gamma$  = 80.742(2)°, *V* = 2804.36(15) Å<sup>3</sup>, *Z* = 2,  $\rho_{\text{calc}}$  = 1.176 Mg/m<sup>3</sup>,  $\mu$  = 1.886 mm<sup>-1</sup>, *F*(000) = 1114, 49723 reflections,  $-14 \leq h \leq 14$ ,  $-15 \leq k \leq 15$ ,  $-21 \leq l \leq 21$ , 2.464° <  $\theta$  < 67.071°, completeness 99.1%, 9921 independent reflections, 8176 reflections observed with [*I* > 2 $\sigma$ (*I*)], 632 parameters, 1453 restraints, *R* indices (all data) *R*<sub>1</sub> = 0.1315, *wR*<sub>2</sub> = 0.3140, final *R* indices [*I* > 2 $\sigma$ (*I*)] *R*<sub>1</sub> = 0.1159, *wR*<sub>2</sub> = 0.3022, largest difference peak and hole 1.521 and -1.642 e Å<sup>-3</sup>, Goof = 1.058.

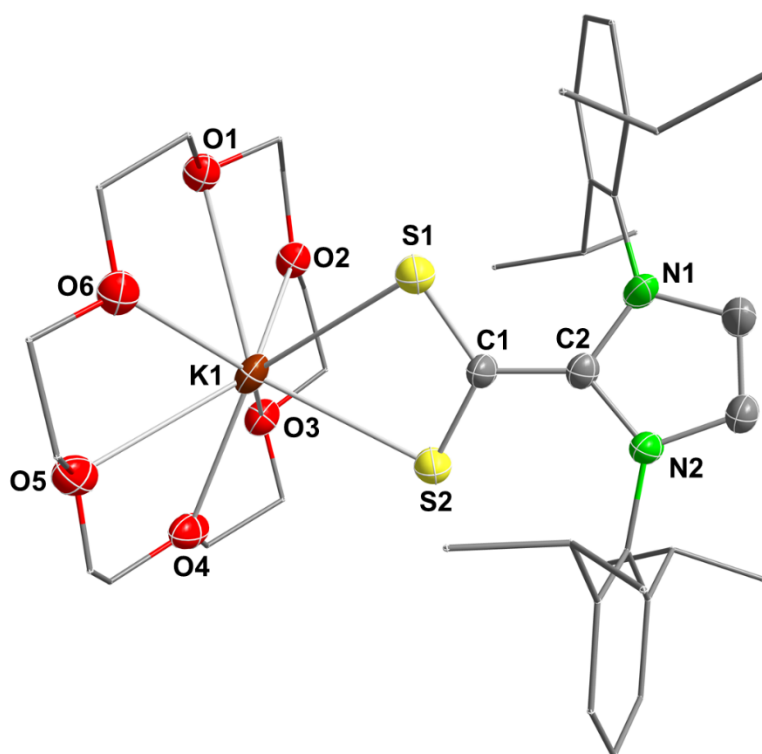

**Figure S26.** Molecular structure of [K(18-crown-6)(IDipp-CS<sub>2</sub>)]·(18-crown-6) (**2b**·18-crown-6) in the solid-state (ellipsoids set at 50% probability level). Due to rapid decomposition of compound **2b** the obtained structure is of a co-crystal of **2b**·18-crown-6 and 13.1% oxidized, neutral IDipp-CS<sub>2</sub> (**1b**). The hydrogen atoms as well as one molecule of co-crystallized 18-crown-6 and the partially co-crystallized IDipp-CS<sub>2</sub> were omitted for clarity. Selected bond lengths [Å] and angles [°]: K1–O1 2.960(1), K1–O2 2.812(1), K1–O3 2.993(1), K1–O4 2.836(1), K1–O5 3.079(1), K1–O6 2.963(1), C1–C2 1.415(1), C2–N1 1.375(1), C2–N2 1.386(1), S1–C1 1.709(1), S2–C1 1.737(9), S1–K1 3.221(1), S2–K1 3.247(1),  $\sphericalangle$ N1C2C1S1 29.1(1),  $\sphericalangle$ N2C2C1S2 31.3(1),  $\sphericalangle$ S1C1S2 124.0(2).

**Crystal Data for [K(18-crown-6)(IMes-CS<sub>2</sub>)]·2MeCN (2c·2MeCN):**

C<sub>38</sub>H<sub>54</sub>KN<sub>4</sub>O<sub>6</sub>S<sub>2</sub>,  $M_r = 766.07$  g/mol,  $T = 100.00(10)$  K,  $\lambda = 1.54184$  Å, purple block,  $0.300 \times 0.080 \times 0.080$  mm<sup>3</sup>, monoclinic, space group  $P2_1/n$ ,  $a = 8.95410(10)$  Å,  $b = 15.7437(3)$  Å,  $c = 28.9534(5)$  Å,  $\alpha = 90^\circ$ ,  $\beta = 96.571(2)^\circ$ ,  $\gamma = 90^\circ$ ,  $V = 4054.77(11)$  Å<sup>3</sup>,  $Z = 4$ ,  $\rho_{\text{calc}} = 1.255$  Mg/m<sup>3</sup>,  $\mu = 2.497$  mm<sup>-1</sup>,  $F(000) = 1636$ , 37237 reflections,  $-10 \leq h \leq 8$ ,  $-18 \leq k \leq 18$ ,  $-34 \leq l \leq 33$ ,  $3.073^\circ < \theta < 67.080^\circ$ , completeness 99.8%, 7239 independent reflections, 5918 reflections observed with  $[I > 2\sigma(I)]$ , 468 parameters, 0 restraints,  $R$  indices (all data)  $R_1 = 0.0843$ ,  $wR_2 = 0.2076$ , final  $R$  indices  $[I > 2\sigma(I)]$   $R_1 = 0.0734$ ,  $wR_2 = 0.1994$ , largest difference peak and hole 0.823 and  $-0.815$  e Å<sup>-3</sup>, Goof = 1.093.

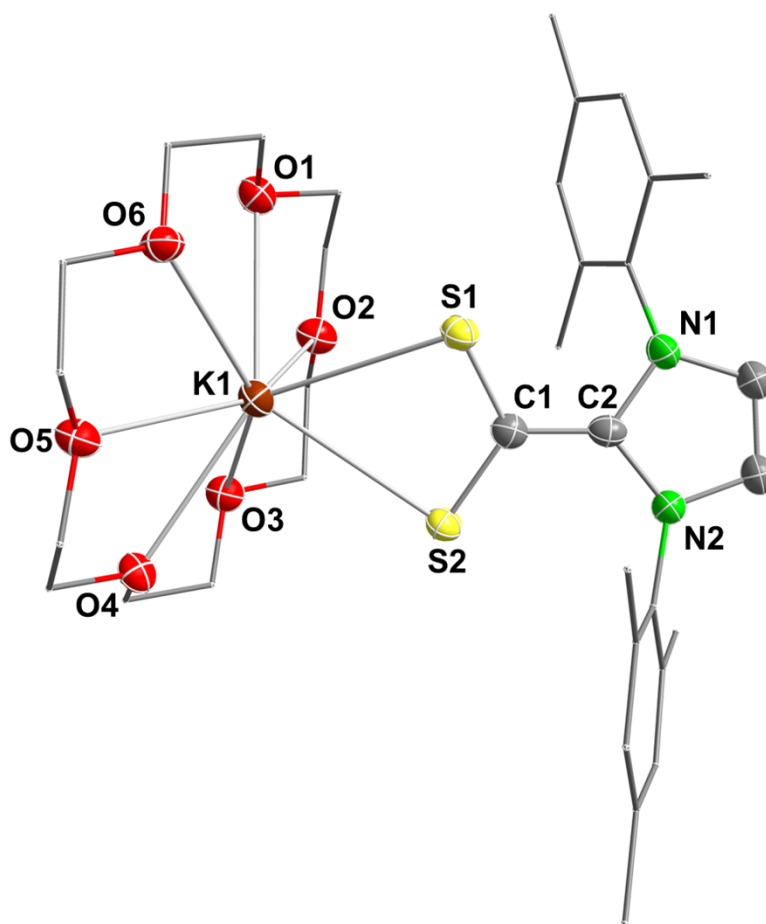

**Figure S27.** Molecular structure of [K(18-crown-6)(IMes-CS<sub>2</sub>)]·2MeCN (**2c·2MeCN**) in the solid-state (ellipsoids set at 50% probability level). The hydrogen atoms as well as two molecules of co-crystallized MeCN were omitted for clarity. Selected bond lengths [Å] and angles [°]: K1–O1 3.017(2), K1–O2 2.806(2), K1–O3 3.01(2), K1–O4 2.991(2), K1–O5 2.931(2), K1–O6 2.942(2), C1–C2 1.407(5), C2–N1 1.388(4), C2–N2 1.387(4), S1–C1 1.734(3), S2–C1 1.733(3), S1–K1 3.216(1), S2–K1 3.212(8),  $\angle$ N1C2C1S1 31.2(4),  $\angle$ N2C2C1S2 31.8(4),  $\angle$ S1C1S2 124.0(2).

**Crystal Data for [Mg(<sup>Dipp</sup>NacNac)(cAAC<sup>Me</sup>-CS<sub>2</sub>)] (3):**

C<sub>50</sub>H<sub>72</sub>MgN<sub>3</sub>S<sub>2</sub>,  $M_r = 803.54$  g/mol,  $T = 100.00(10)$  K,  $\lambda = 0.71073$  Å, green plate,  $0.450 \times 0.340 \times 0.120$  mm<sup>3</sup>, monoclinic, space group  $P2_1/m$ ,  $a = 10.6763(2)$  Å,  $b = 19.9981(3)$  Å,  $c = 11.7538(2)$  Å,  $\alpha = 90^\circ$ ,  $\beta = 109.747(2)^\circ$ ,  $\gamma = 90^\circ$ ,  $V = 2361.93(7)$  Å<sup>3</sup>,  $Z = 2$ ,  $\rho_{\text{calc}} = 1.130$  Mg/m<sup>3</sup>,  $\mu = 0.162$  mm<sup>-1</sup>,  $F(000) = 874$ , 46455 reflections,  $-13 \leq h \leq 13$ ,  $-26 \leq k \leq 24$ ,  $-14 \leq l \leq 15$ ,  $1.841^\circ < \theta < 28.837^\circ$ , completeness 99.9%, 5611 independent reflections, 5611 reflections observed with  $[I > 2\sigma(I)]$ , 280 parameters, 0 restraints,  $R$  indices (all data)  $R_1 = 0.0434$ ,  $wR_2 = 0.1050$ , final  $R$  indices  $[I > 2\sigma(I)]$   $R_1 = 0.0388$ ,  $wR_2 = 0.1020$ , largest difference peak and hole 0.410 and  $-0.439$  e Å<sup>-3</sup>, Goof = 1.041.

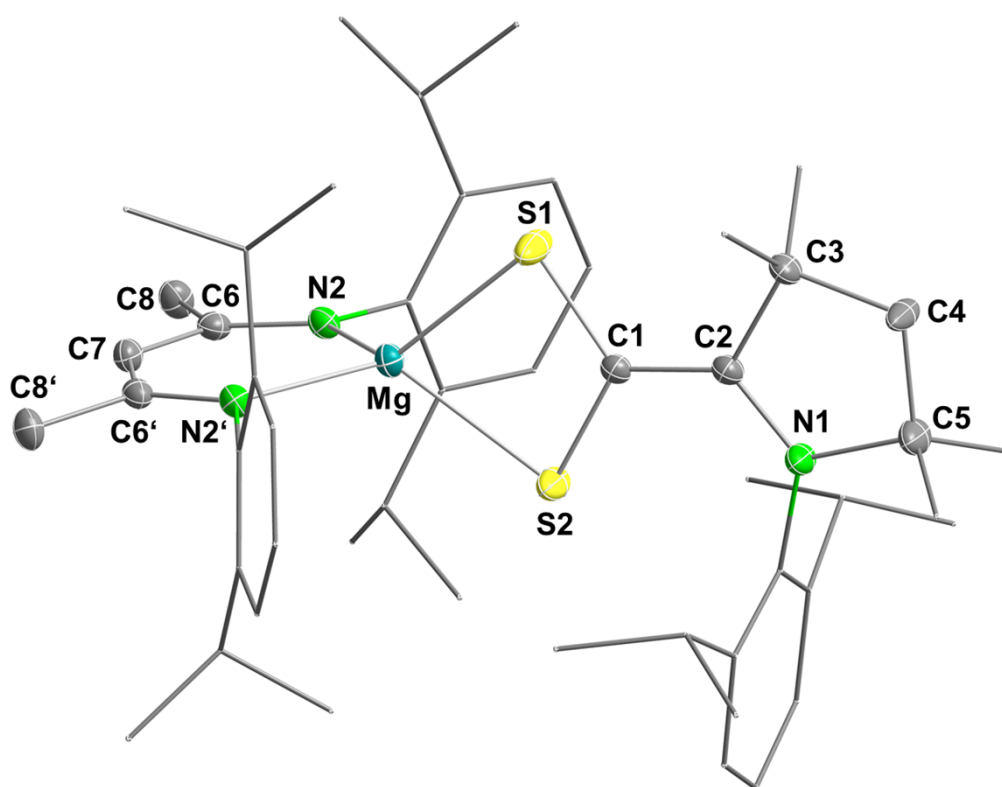

**Figure S28.** Molecular structure of [Mg(<sup>Dipp</sup>NacNac)(cAAC<sup>Me</sup>-CS<sub>2</sub>)] (3) in the solid-state (ellipsoids set at 50% probability level). The hydrogen atoms are omitted for clarity. Selected bond lengths [Å] and angles [°]: Mg–S1 2.443(1), Mg–S2 2.430(1), Mg–N2 2.029(1), S1–C1 1.736(2), S2–C1 1.727(2), C1–C2 1.420(2), N1–C2 1.358(2),  $\angle$ S1C1S2 115.8(1),  $\angle$ N2MgN2' 92.9(1),  $\angle$ S1MgS2 74.1(1),  $\angle$ S1MgN2 124.8(1),  $\angle$ S2MgN2 121.9(1),  $\angle$ N1C2C1S2 0.0(2).

## 9 Quantumchemical Calculations Section

### 9.1 General Information

Calculations were carried out using the TURBOMOLE V7.8 program suite, a development of the University of Karlsruhe and the Forschungszentrum Karlsruhe GmbH, 1989-2007, TURBOMOLE GmbH, since 2007; available from <https://www.turbomole.org>.<sup>[18]</sup> Geometry optimizations and frequency calculations were performed using (RI-)DFT calculations<sup>[19]</sup> on a m4 grid employing the BP86<sup>[20]</sup> functional and def2-SVP basis sets.<sup>[21]</sup> Vibrational frequencies were calculated at the same level with the AOFORCE<sup>[22]</sup> module and all structures represented true minima without imaginary frequencies (denoted as BP86/def2-SVP). Total energies, orbital energies, and orbital plots and were calculated using these geometries, the B3LYP<sup>[20b,21]</sup> functional and a def2-TZVP<sup>[21]</sup> basis set for all atoms (denoted as B3LYP/def2-TZVP). Vertical excitation energies were computed at the TD-DFT level<sup>[24]</sup> using the long range corrected  $\omega$ B97X-D<sup>[25]</sup> functional and a def2-TZVP basis set (denoted as  $\omega$ B97X/def2-TZVP).

### 9.2 Cartesian Coordinates of Geometry-optimized Molecules

#### IMe<sup>Me</sup>-CS<sub>2</sub>\_C2v\_planar

Energy = -1217.515793033

|   |            |            |            |
|---|------------|------------|------------|
| C | 0.0000000  | 0.0000000  | 1.3428718  |
| N | 0.0000000  | 1.0944320  | 0.4921197  |
| C | 0.0000000  | 0.6888145  | -0.8379725 |
| N | 0.0000000  | -1.0944320 | 0.4921197  |
| C | 0.0000000  | -0.6888145 | -0.8379725 |
| C | 0.0000000  | 2.5309377  | 0.7919232  |
| H | 0.0000000  | 2.6471595  | 1.8977792  |
| C | 0.0000000  | -2.5309377 | 0.7919232  |
| H | 0.0000000  | -2.6471595 | 1.8977792  |
| C | 0.0000000  | 0.0000000  | 2.8585308  |
| S | 0.0000000  | -1.4762730 | 3.7147432  |
| S | 0.0000000  | 1.4762730  | 3.7147432  |
| C | 0.0000000  | -1.6497253 | -1.9802770 |
| H | 0.8924117  | -2.3092841 | -1.9693077 |
| H | -0.8924117 | -2.3092841 | -1.9693077 |
| H | 0.0000000  | -1.1014281 | -2.9401285 |
| C | 0.0000000  | 1.6497253  | -1.9802770 |
| H | -0.8924117 | 2.3092841  | -1.9693077 |
| H | 0.8924117  | 2.3092841  | -1.9693077 |
| H | 0.0000000  | 1.1014281  | -2.9401285 |
| H | 0.9036950  | 2.9937828  | 0.3498290  |
| H | -0.9036950 | 2.9937828  | 0.3498290  |
| H | -0.9036950 | -2.9937828 | 0.3498290  |
| H | 0.9036950  | -2.9937828 | 0.3498290  |

#### IMe<sup>Me</sup>-CS<sub>2</sub>\_C2v\_orthogonal

Energy = -1217.532315188

|   |           |            |            |
|---|-----------|------------|------------|
| C | 0.0000000 | 0.0000000  | 1.2551939  |
| N | 0.0000000 | 1.0926631  | 0.4450001  |
| C | 0.0000000 | 0.6902504  | -0.8987000 |
| N | 0.0000000 | -1.0926631 | 0.4450001  |
| C | 0.0000000 | -0.6902504 | -0.8987000 |
| C | 0.0000000 | 2.4670128  | 0.9239584  |
| H | 0.0000000 | 2.4512276  | 2.0279766  |
| C | 0.0000000 | -2.4670128 | 0.9239584  |
| H | 0.0000000 | -2.4512276 | 2.0279766  |
| C | 0.0000000 | 0.0000000  | 2.7407539  |
| S | 1.5571679 | 0.0000000  | 3.3993486  |

|   |            |            |            |
|---|------------|------------|------------|
| S | -1.5571679 | 0.0000000  | 3.3993486  |
| C | 0.0000000  | -1.6709060 | -2.0238954 |
| H | 0.8944455  | -2.3290320 | -2.0021508 |
| H | -0.8944455 | -2.3290320 | -2.0021508 |
| H | 0.0000000  | -1.1426033 | -2.9952245 |
| C | 0.0000000  | 1.6709060  | -2.0238954 |
| H | -0.8944455 | 2.3290320  | -2.0021508 |
| H | 0.8944455  | 2.3290320  | -2.0021508 |
| H | 0.0000000  | 1.1426033  | -2.9952245 |
| H | 0.9042666  | 3.0005529  | 0.5704574  |
| H | -0.9042666 | 3.0005529  | 0.5704574  |
| H | -0.9042666 | -3.0005529 | 0.5704574  |
| H | 0.9042666  | -3.0005529 | 0.5704574  |

#### IMe<sup>Me</sup>-CS<sub>2</sub>

Energy = -1217.532314686

|   |            |            |            |
|---|------------|------------|------------|
| C | -0.0004594 | -0.0000000 | 1.0197395  |
| N | -0.0007070 | 1.0926653  | 0.2094828  |
| C | -0.0016693 | 0.6902812  | -1.1341414 |
| N | -0.0007070 | -1.0926653 | 0.2094828  |
| C | -0.0016693 | -0.6902812 | -1.1341414 |
| C | -0.0006089 | 2.4670097  | 0.6884218  |
| H | -0.0031368 | 2.4511802  | 1.7924889  |
| C | -0.0006089 | -2.4670097 | 0.6884218  |
| H | -0.0031368 | -2.4511802 | 1.7924889  |
| C | 0.0015882  | -0.0000000 | 2.5053355  |
| S | 1.5597911  | -0.0000000 | 3.1617547  |
| S | -1.5544833 | 0.0000000  | 3.1661126  |
| C | 0.0000780  | -1.6708488 | -2.2593880 |
| H | 0.8950092  | -2.3282959 | -2.2368488 |
| H | -0.8938246 | -2.3297431 | -2.2385562 |
| H | 0.0005243  | -1.1425591 | -3.2307198 |
| C | 0.0000780  | 1.6708488  | -2.2593880 |
| H | -0.8938246 | 2.3297431  | -2.2385562 |
| H | 0.8950092  | 2.3282959  | -2.2368488 |
| H | 0.0005243  | 1.1425591  | -3.2307198 |
| H | 0.9048729  | 2.9999432  | 0.3367992  |
| H | -0.9037561 | 3.0011376  | 0.3328402  |
| H | -0.9037561 | -3.0011376 | 0.3328402  |
| H | 0.9048729  | -2.9999432 | 0.3367992  |

**[IMe<sup>Me</sup>-CS<sub>2</sub>]<sup>-</sup>**

Energy = -1217.542922891

|   |            |            |            |
|---|------------|------------|------------|
| C | 0.0000188  | 0.0000110  | 1.0988969  |
| N | -0.1479335 | 1.1080123  | 0.2257897  |
| C | -0.0794491 | 0.6825525  | -1.1069669 |
| N | 0.1480265  | -1.1079948 | 0.2258063  |
| C | 0.0795225  | -0.6825552 | -1.1069548 |
| C | 0.0489910  | 2.4875297  | 0.6238020  |
| H | -0.3603154 | 2.5807222  | 1.6640268  |
| C | -0.0488821 | -2.4875092 | 0.6238258  |
| H | 0.3604036  | -2.5806817 | 1.6640584  |
| C | -0.0000989 | 0.0000136  | 2.5363934  |
| S | 0.9280481  | -1.2181800 | 3.3821323  |
| S | -0.9283725 | 1.2182106  | 3.3819698  |
| C | 0.1582254  | -1.6344345 | -2.2555824 |
| H | 1.1140328  | -2.2061036 | -2.2631066 |
| H | -0.6603032 | -2.3893454 | -2.2432271 |
| H | 0.0918683  | -1.0876540 | -3.2164802 |
| C | -0.1582739 | 1.6343998  | -2.2556167 |
| H | -1.1141224 | 2.2060047  | -2.2630977 |
| H | 0.6602043  | 2.3893676  | -2.2433283 |
| H | -0.0919372 | 1.0876015  | -3.2165060 |
| H | 1.1300057  | 2.7698661  | 0.6268585  |
| H | -0.4951585 | 3.1620624  | -0.0679491 |
| H | -1.1298896 | -2.7698623 | 0.6268717  |
| H | 0.4952893  | -3.1620330 | -0.0679158 |

**cAAC<sup>Me</sup>-CS<sub>2</sub>**

Energy = -1669.278163662

|   |            |            |            |
|---|------------|------------|------------|
| C | 0.7837347  | -0.3763069 | 0.9292061  |
| C | 0.4586703  | 0.3992543  | 2.2230311  |
| C | 0.4253847  | 1.8703853  | 1.7055522  |
| C | 1.1627868  | 1.8843880  | 0.3479050  |
| H | -0.6253316 | 2.1927962  | 1.5544003  |
| H | 0.8860023  | 2.5746221  | 2.4250488  |
| C | -0.9421071 | -0.0520203 | 2.7119649  |
| H | -1.7058028 | 0.0348102  | 1.9143613  |
| H | -0.9271068 | -1.1069730 | 3.0468451  |
| H | -1.2532842 | 0.5863764  | 3.5649147  |
| C | 1.4633809  | 0.2058197  | 3.3771523  |
| H | 1.5223324  | -0.8570673 | 3.6782588  |
| H | 2.4846075  | 0.5282923  | 3.1006861  |
| H | 1.1284647  | 0.8034515  | 4.2506062  |
| C | 0.6295351  | 2.9395961  | -0.6212487 |
| H | 0.8851958  | 3.9439450  | -0.2286661 |
| H | 1.0909388  | 2.8420864  | -1.6238143 |
| H | -0.4682804 | 2.8921295  | -0.7334142 |
| C | 2.6812338  | 2.0779599  | 0.5354350  |
| H | 3.2084671  | 2.1079051  | -0.4360916 |
| H | 2.8664876  | 3.0431804  | 1.0482801  |
| H | 3.1252949  | 1.2671774  | 1.1450856  |
| N | 0.8888101  | 0.4530362  | -0.1197950 |
| C | 0.7435181  | 0.0675853  | -1.5191490 |
| C | -0.5634351 | 0.1426429  | -2.0961754 |
| C | 1.8650654  | -0.3552219 | -2.2877338 |
| C | -0.7075453 | -0.2109076 | -3.4520852 |
| C | 1.6516564  | -0.6879681 | -3.6421682 |
| C | 0.3839568  | -0.6194718 | -4.2249485 |
| H | -1.7071835 | -0.1677558 | -3.9100267 |
| H | 2.5078655  | -1.0191934 | -4.2488771 |
| H | 0.2438569  | -0.8905161 | -5.2826482 |
| C | -1.8248646 | 0.5754456  | -1.3408366 |
| H | -1.5156968 | 0.9137973  | -0.3311457 |
| C | -2.5429936 | 1.7534587  | -2.0359007 |
| H | -3.3734719 | 2.1257764  | -1.4012161 |
| H | -1.8647325 | 2.6038542  | -2.2489345 |
| H | -2.9891786 | 1.4404393  | -3.0020643 |
| C | -2.8070029 | -0.5991096 | -1.1456077 |
| H | -3.6930724 | -0.2661793 | -0.5653754 |
| H | -3.1720746 | -0.9795911 | -2.1224981 |
| H | -2.3201040 | -1.4351553 | -0.6050384 |
| C | 3.2875821  | -0.4776273 | -1.7419170 |
| H | 3.2532714  | -0.2730702 | -0.6533628 |
| C | 4.2366254  | 0.5399253  | -2.4112860 |
| H | 3.8578833  | 1.5804123  | -2.3437109 |
| H | 5.2388862  | 0.5089514  | -1.9361762 |

|   |            |            |            |
|---|------------|------------|------------|
| H | 4.3737007  | 0.3149686  | -3.4895653 |
| C | 3.8392393  | -1.9096427 | -1.9027659 |
| H | 4.8418161  | -1.9854677 | -1.4339595 |
| H | 3.1821552  | -2.6510949 | -1.4090966 |
| H | 3.9492199  | -2.1907237 | -2.9709883 |
| C | 0.8786684  | -1.8510201 | 0.8637746  |
| S | -0.3775617 | -2.8739111 | 0.4728522  |
| S | 2.4897357  | -2.1284742 | 1.3405273  |

**IDipp-CS<sub>2</sub>**

Energy = -1993.590615953

|   |            |            |            |
|---|------------|------------|------------|
| S | -0.0006451 | 1.5410945  | 2.5892932  |
| S | 0.0014418  | -1.5452959 | 2.5870133  |
| C | 0.0003067  | -0.0016814 | 1.9047064  |
| C | 0.0000568  | -0.0008679 | 0.4181877  |
| N | -1.0994346 | -0.0006726 | -0.3986035 |
| N | 1.0992531  | -0.0007236 | -0.3990456 |
| C | -0.6844603 | -0.0005922 | -1.7303844 |
| C | -2.4896623 | -0.0000796 | 0.0191588  |
| C | 0.6837734  | -0.0004651 | -1.7306670 |
| C | 2.4894724  | -0.0003098 | 0.0187043  |
| H | -1.4055106 | -0.0007642 | -2.5515025 |
| C | -3.1450376 | -1.2475421 | 0.1903130  |
| C | -3.1441616 | 1.2480850  | 0.1889175  |
| H | 1.4044708  | -0.0001165 | -2.5521026 |
| C | 3.1437538  | 1.2477792  | 0.1897627  |
| C | 3.1449886  | -1.2478511 | 0.1888722  |
| C | -4.5092191 | -1.2131647 | 0.5424821  |
| C | -2.4433918 | -2.5848677 | -0.0433378 |
| C | -4.5084048 | 1.2150947  | 0.5409877  |
| C | -2.4412796 | 2.5847110  | -0.0452592 |
| C | 4.5077944  | 1.2146549  | 0.5426249  |
| C | 2.4410776  | 2.5844981  | -0.0444495 |
| C | 4.5089944  | -1.2136069 | 0.5417070  |
| C | 2.4436510  | -2.5850897 | -0.0462308 |
| C | -5.1844905 | 0.0012942  | 0.7160668  |
| H | -5.0502893 | -2.1598942 | 0.6867890  |
| H | -1.3505709 | -2.4010270 | 0.0099427  |
| H | -5.0487593 | 2.1623854  | 0.6843766  |
| H | -1.3486148 | 2.3998944  | 0.0086308  |
| C | 5.1839600  | 0.0007910  | 0.7169221  |
| H | 5.0479670  | 2.1618856  | 0.6871024  |
| H | 1.3483515  | 2.3996927  | 0.0081984  |
| H | 5.0501359  | -2.1603841 | 0.6854155  |
| H | 1.3507823  | -2.4014405 | 0.0065736  |
| H | -6.2496469 | 0.0018338  | 0.9944769  |
| H | 6.2489620  | 0.0012307  | 0.9959165  |
| C | 2.7784272  | -3.1374024 | -1.4492141 |
| H | 2.4984448  | -2.4273260 | -2.2537261 |
| H | 3.8650310  | -3.3420745 | -1.5499246 |
| H | 2.2370952  | -4.0882388 | -1.6341764 |
| C | 2.7574927  | -3.6207472 | 1.0483042  |
| H | 2.1514064  | -4.5356485 | 0.8885850  |
| H | 3.8235728  | -3.9297312 | 1.0426574  |
| H | 2.5085888  | -3.2210765 | 2.0507579  |
| C | -2.7774129 | -3.1385196 | -1.4459381 |
| H | -2.2358280 | -4.0894384 | -1.6297132 |
| H | -3.8639320 | -3.3434611 | -1.5470366 |
| H | -2.4970810 | -2.4291519 | -2.2509547 |
| C | -2.7575802 | -3.6195543 | 1.0520371  |
| H | -2.5093428 | -3.2188934 | 2.0542646  |
| H | -3.8235698 | -3.9288608 | 1.0461188  |
| H | -2.1511169 | -4.5344192 | 0.8935608  |
| C | -2.7550741 | 3.6202797  | 1.0494659  |
| H | -3.8206500 | 3.9310462  | 1.0423424  |
| H | -2.5083817 | 3.2196194  | 2.0521266  |
| H | -2.1471806 | 4.5342818  | 0.8912255  |
| C | -2.7739828 | 3.1380954  | -1.4482912 |
| H | -2.2314710 | 4.0885119  | -1.6320508 |
| H | -2.4937303 | 2.4282144  | -2.2528861 |
| H | -3.8602757 | 3.3439288  | -1.5501316 |
| C | 2.7538357  | 3.6197505  | 1.0508454  |
| H | 3.8195481  | 3.9300738  | 1.0451681  |
| H | 2.1465408  | 4.5340339  | 0.8919299  |
| H | 2.5056332  | 3.2189960  | 2.0530983  |
| C | 2.7751697  | 3.1381745  | -1.4470663 |
| H | 2.2327876  | 4.0885819  | -1.6312607 |



H 3.8615587 3.3440937 -1.5477049  
H 2.4958630 2.4283730 -2.2520722

### IMes-CS<sub>2</sub>

Energy = -1757.905078918

S -1.4432273 2.6486769 0.1272033  
S -1.6160960 0.2574238 2.0512252  
C -1.9943791 1.8027433 1.4820757  
C -2.9808396 2.5459944 2.3168021  
N -2.6997543 3.3752533 3.3687928  
N -4.3426509 2.5313784 2.1799569  
C -3.8903950 3.8802271 3.8910236  
C -1.3874149 3.7031144 3.8879622  
C -4.9140268 3.3545434 3.1502029  
C -5.1083210 1.7926326 1.1964193  
H -3.8911681 4.5669270 4.7418947  
C -0.8523624 2.9084530 4.9287482  
C -0.7194426 4.8394846 3.3734898  
H -5.9974924 3.4852029 3.2174701  
C -5.4199414 2.4208490 -0.0309151  
C -5.5590289 0.4912492 1.5256525  
C 0.4114707 3.2696215 5.4331437  
C -1.5987252 1.7152370 5.4703285  
C 0.5404880 5.1501290 3.9183322  
C -1.3261553 5.6785858 2.2772152  
C -6.1882790 1.6868344 -0.9561132  
C -4.9385835 3.8146250 -0.3467634  
C -6.3223039 -0.1910534 0.5614313  
C -5.2214163 -0.1444862 2.8507752  
C 1.1272777 4.3770326 4.9391627  
H 0.8483543 2.6590598 6.2397755  
H -1.0383300 1.2398745 6.2973868  
H -2.6031109 1.9933806 5.8538251  
H -1.7505771 0.9601102 4.6658348  
H 1.0794710 6.0275789 3.5260079  
H -0.6746345 6.5378659 2.0296590  
H -1.4673043 5.0651835 1.3584503  
H -2.3226826 6.0767895 2.5628850  
C -6.6437782 0.3835734 -0.6849762  
H -6.4319479 2.1543279 -1.9236413  
H -3.8253018 3.8458181 -0.3477206  
H -5.2998446 4.1423933 -1.3398119  
H -5.2881604 4.5538793 0.4046111  
H -6.6725791 -1.2095590 0.7949285  
H -4.1178613 -0.2529463 2.9544746  
H -5.5733266 0.4696327 3.7065055  
H -5.6829556 -1.1462146 2.9383871  
C 2.5015479 4.7124249 5.4701433  
C -7.4644821 -0.3855343 -1.6943028  
H 2.6926108 5.8038976 5.4530746  
H 2.6398564 4.3521475 6.5086378  
H 3.2904952 4.2344060 4.8498713  
H -7.0041764 -1.3698158 -1.9197908  
H -8.4863851 -0.5899863 -1.3101981  
H -7.5668301 0.1682341 -2.6474322

### [cAAC<sup>Me</sup>-CS<sub>2</sub>]-

Energy = -1669.320988381

C 0.7199019 -0.4261163 0.9920678  
C 0.9057041 0.3851259 2.2927683  
C 0.5387656 1.8196245 1.8366323  
C 0.7917098 1.8953683 0.3183452  
H -0.5421904 1.9969574 2.0214973  
H 1.0999976 2.6014133 2.3896892  
C -0.0642665 -0.0804634 3.4026307  
H -1.1162786 -0.0444150 3.0507461  
H 0.1754535 -1.1262946 3.6833925  
H 0.0296860 0.5773825 4.2951471  
C 2.3504341 0.3204011 2.8547217  
H 2.5768484 -0.7363044 3.1052585  
H 3.1052765 0.6681979 2.1214175  
H 2.4357094 0.9612571 3.7614546  
C -0.1658093 2.9035633 -0.3381767  
H 0.0729189 3.9211462 0.0359548  
H -0.0570266 2.9132418 -1.4407637  
H -1.2217057 2.6910398 -0.0881237  
C 2.2308148 2.3509620 -0.0199177

H 2.3887047 2.3565643 -1.1167655  
H 2.3990432 3.3823438 0.3554266  
H 2.9935117 1.6941109 0.4354171  
N 0.5417928 0.4658317 -0.0869438  
C 0.5940470 0.1297885 -1.4946957  
C -0.5632812 0.3680406 -2.3097545  
C 1.8336476 -0.2394667 -2.1159642  
C -0.4403447 0.2875112 -3.7090705  
C 1.8909937 -0.3091210 -3.5219771  
C 0.7774347 -0.0326805 -4.3242485  
H -1.3318298 0.4576498 -4.3341182  
H 2.8402085 -0.6002350 -4.0002563  
H 0.8527133 -0.0847618 -5.4224433  
C -1.9643300 0.5637126 -1.7190166  
H -1.8331159 0.7479200 -0.6339085  
C -2.7374985 1.7469867 -2.3348368  
H -3.7007863 1.8984560 -1.8022673  
H -2.1716214 2.6992924 -2.2944130  
H -2.9886804 1.5563850 -3.4001079  
C -2.7943944 -0.7321096 -1.8493958  
H -3.7851150 -0.6097064 -1.3595994  
H -2.9711772 -0.9866210 -2.9169457  
H -2.2499252 -1.5704254 -1.3647919  
C 3.0742464 -0.6757042 -1.3295943  
H 2.8869821 -0.4729655 -0.2568839  
C 4.3559779 0.0753086 -1.7464707  
H 4.2479605 1.1761871 -1.6735045  
H 5.2061107 -0.2273764 -1.0989587  
H 4.6464922 -0.1620114 -2.7922933  
C 3.2922698 -2.2012647 -1.4559542  
H 4.1150281 -2.5294494 -0.7867203  
H 2.3706621 -2.7519510 -1.1753233  
H 3.5653116 -2.4760336 -2.4986430  
C 0.6508766 -1.8621830 0.8986909  
S -0.1271108 -2.6045090 -0.4605471  
S 1.4044523 -2.8196008 2.1397372

### [IDipp-CS<sub>2</sub>]-

Energy = -1993.621502782

S 1.5395127 0.0006825 2.7636872  
S -1.5402610 -0.0013553 2.7633121  
C -0.0002672 -0.0003078 1.9517386  
C -0.0000923 -0.0002653 0.5314765  
N -1.1187925 -0.0005964 -0.3384240  
N 1.1188354 -0.0000218 -0.3381220  
C -0.6819320 -0.0005778 -1.6646519  
C -2.5355080 -0.0003125 -0.0512872  
C 0.6823266 -0.0001870 -1.6644663  
C 2.5354878 0.0001764 -0.0506310  
H -1.3975791 -0.0008196 -2.4914260  
C -3.2365851 -1.2411673 -0.0830805  
C -3.2359108 1.2409828 -0.0818868  
H 1.3981981 -0.0000352 -2.4910501  
C 3.2361147 1.2412952 -0.0823186  
C 3.2363262 -1.2408593 -0.0813670  
C -4.6426424 -1.2120429 -0.0691025  
C -2.4957021 -2.5757167 -0.0382271  
C -6.6419829 1.2125992 -0.0677948  
C -2.4943461 2.5751252 -0.0359914  
C 4.6421875 1.2126677 -0.0687572  
C 2.4947720 2.5755750 -0.0368889  
C 4.6423876 -1.2119720 -0.0676967  
C 2.4952444 -2.5752563 -0.0351378  
C -5.3494258 0.0004598 -0.0582416  
H -5.1991373 -2.1635698 -0.0615075  
H -1.4139752 -2.3510874 -0.1340922  
H -5.1979590 2.1644253 -0.0590469  
H -1.4127327 2.3500432 -0.1320616  
C 5.3494023 0.0004158 -0.0582757  
H 5.1983441 2.1643904 -0.0611548  
H 1.4130904 2.3506011 -0.1324799  
H 5.1987048 -2.1635949 -0.0591664  
H 1.4135208 -2.3505540 -0.1308600  
H -6.4511698 0.0007529 -0.0498071  
H 6.4511455 0.0005137 -0.0500647  
C 2.8797615 -3.5044271 -1.2027083  
H 2.6964750 -3.0235304 -2.1860581

|   |            |            |            |
|---|------------|------------|------------|
| H | 3.9529892  | -3.7897623 | -1.1650859 |
| H | 2.2885504  | -4.4442051 | -1.1670875 |
| C | 2.6912162  | -3.2588998 | 1.3343543  |
| H | 2.0757179  | -4.1812187 | 1.4052268  |
| H | 3.7533813  | -3.5463999 | 1.4923333  |
| H | 2.3871012  | -2.5622089 | 2.1445633  |
| C | -2.8807030 | -3.5038230 | -1.2064825 |
| H | -2.2895488 | -4.4436758 | -1.1719256 |
| H | -3.9539348 | -3.7891230 | -1.1687335 |
| H | -2.6977422 | -3.0220502 | -2.1894630 |
| C | -2.6913659 | -3.2604958 | 1.3307402  |
| H | -2.3869452 | -2.5645454 | 2.1414758  |
| H | -3.7535358 | -3.5479453 | 1.4887788  |
| H | -2.0760051 | -4.1829833 | 1.4006376  |
| C | -2.6896175 | 3.2589687  | 1.3335111  |
| H | -3.7516124 | 3.5469506  | 1.4917754  |
| H | -2.3855810 | 2.5622159  | 2.1437001  |
| H | -2.0736948 | 4.1810261  | 1.4041262  |
| C | -2.8789313 | 3.5043172  | -1.2035192 |
| H | -2.2872860 | 4.4438353  | -1.1689265 |
| H | -2.6962627 | 3.0232093  | -2.1868815 |
| H | -3.9520181 | 3.7901336  | -1.1654922 |
| C | 2.6906361  | 3.2600041  | 1.3322225  |
| H | 3.7527467  | 3.5478276  | 1.4899829  |
| H | 2.0749286  | 4.1822206  | 1.4026237  |
| H | 2.3867639  | 2.5636762  | 2.1428392  |
| C | 2.8790868  | 3.5041809  | -1.2049767 |
| H | 2.2876580  | 4.4438424  | -1.1698998 |
| H | 3.9522444  | 3.7897999  | -1.1675066 |
| H | 2.6959278  | 3.0226787  | -2.1880538 |

**[IMes-CS<sub>2</sub>]<sup>-</sup>**

Energy = -1757.924967338

|   |            |            |            |
|---|------------|------------|------------|
| S | -2.3492652 | 0.7424527  | -0.1263543 |
| S | -0.0441697 | 1.9388757  | 1.5302574  |
| C | -1.7245800 | 1.7293631  | 1.1556587  |
| C | -2.6660121 | 2.4707616  | 1.9298623  |
| N | -2.3824558 | 3.4433255  | 2.9182674  |
| N | -4.0599125 | 2.5768907  | 1.7085721  |
| C | -3.5455196 | 4.1629154  | 3.2026621  |
| C | -1.1791456 | 3.6805607  | 3.6714457  |
| C | -4.5666185 | 3.6355755  | 2.4659074  |
| C | -4.9485845 | 1.7377186  | 0.9485407  |
| H | -3.5431059 | 4.9627125  | 3.9490586  |
| C | -0.8522585 | 2.8296254  | 4.7661159  |
| C | -0.5163977 | 4.9273640  | 3.5026409  |
| H | -5.6315004 | 3.8848173  | 2.4411894  |
| C | -5.6055985 | 2.3025503  | -0.1784130 |
| C | -5.3834540 | 0.4946096  | 1.4923740  |
| C | 0.1571941  | 3.2356589  | 5.6511775  |
| C | -1.5263649 | 1.4920381  | 4.9047497  |
| C | 0.4822455  | 5.2892982  | 4.4244894  |
| C | -0.7800154 | 5.7528718  | 2.2693235  |
| C | -6.6784474 | 1.5984274  | -0.7551266 |
| C | -5.0462126 | 3.5437823  | -0.8248823 |
| C | -6.4530804 | -0.1684925 | 0.8742926  |
| C | -4.6418384 | -0.1187177 | 2.6484140  |
| C | 0.8392901  | 4.4647438  | 5.5091816  |
| H | 0.4200304  | 2.5660940  | 6.4887387  |
| H | -1.2227856 | 0.9772945  | 5.8380151  |
| H | -2.6330138 | 1.5791492  | 4.8934399  |
| H | -1.2425077 | 0.8625573  | 4.0314914  |
| H | 1.0146408  | 6.2448563  | 4.2749159  |
| H | -0.1549375 | 6.6681755  | 2.2539470  |
| H | -0.5330714 | 5.1307248  | 1.3789096  |
| H | -1.8430267 | 6.0558478  | 2.1620211  |
| C | -7.1269348 | 0.3638665  | -0.2483252 |
| H | -7.1675008 | 2.0239289  | -1.6488359 |
| H | -3.9981280 | 3.3288356  | -1.1351262 |
| H | -5.6340357 | 3.8345045  | -1.7185949 |
| H | -5.0032103 | 4.4154547  | -0.1381779 |
| H | -6.7747962 | -1.1409791 | 1.2862761  |
| H | -3.6084216 | -0.3618841 | 2.3131162  |
| H | -4.5466251 | 0.5835159  | 3.5028192  |
| H | -5.1362777 | -1.0439960 | 3.0053965  |
| C | 1.9392979  | 4.8576577  | 6.4699470  |
| C | -8.2877593 | -0.3749179 | -0.8761164 |

|   |            |            |            |
|---|------------|------------|------------|
| H | 2.1551269  | 5.9447990  | 6.4228616  |
| H | 1.6780967  | 4.6101465  | 7.5211366  |
| H | 2.8923903  | 4.3266901  | 6.2466089  |
| H | -8.0057677 | -1.4076485 | -1.1769444 |
| H | -9.1472126 | -0.4741778 | -0.1755420 |
| H | -8.6585627 | 0.1455765  | -1.7823823 |

**[K(18-crown-6)(cAAC<sup>Me</sup>-CS<sub>2</sub>)]**

Energy = -3193.292315235

|   |            |            |            |
|---|------------|------------|------------|
| S | 4.1826639  | 6.0484695  | 14.2036377 |
| C | 4.6308744  | 6.9600828  | 15.6202477 |
| S | 3.5661154  | 8.2117466  | 16.2274251 |
| C | 5.8733920  | 6.6972374  | 16.2994708 |
| N | 6.7896794  | 5.6997897  | 15.9535049 |
| C | 7.8133811  | 5.4716528  | 17.0499243 |
| C | 7.8004691  | 6.8417480  | 17.7521349 |
| H | 8.5482114  | 7.4996077  | 17.2612520 |
| H | 8.0851245  | 6.7660879  | 18.8208632 |
| C | 6.3839718  | 7.4438379  | 17.5617639 |
| C | 6.5285282  | 8.9718057  | 17.3499988 |
| H | 7.1440911  | 9.1962545  | 16.4545373 |
| H | 7.0388617  | 9.4151255  | 18.2325816 |
| H | 5.5371558  | 9.4440640  | 17.2173073 |
| C | 5.4822084  | 7.2011980  | 18.7983458 |
| H | 4.4720788  | 7.6101371  | 18.6007619 |
| H | 5.9142751  | 7.7107864  | 19.6858570 |
| H | 5.3790218  | 6.1251831  | 19.0397085 |
| C | 9.2063121  | 5.1340529  | 16.4994284 |
| H | 9.2187004  | 4.1658859  | 15.9620711 |
| H | 9.9180964  | 5.0657264  | 17.3473719 |
| H | 9.5745761  | 5.9131754  | 15.8054398 |
| C | 7.3781843  | 4.3505898  | 18.0231862 |
| H | 6.3302445  | 4.4780944  | 18.3543001 |
| H | 8.0255410  | 4.3743571  | 18.9240282 |
| H | 7.4797034  | 3.3486260  | 17.5697163 |
| C | 7.0265338  | 5.1415106  | 14.6371062 |
| C | 6.7747363  | 3.7608067  | 14.3745148 |
| C | 7.1872359  | 3.2199182  | 13.1415694 |
| H | 6.9883417  | 2.1569453  | 12.9319123 |
| C | 7.8204802  | 4.0031337  | 12.1695769 |
| H | 8.1352848  | 3.5582143  | 11.2126246 |
| C | 8.0424130  | 5.3604715  | 12.4270925 |
| H | 8.5288335  | 5.9828593  | 11.6594253 |
| C | 7.6669251  | 5.9531614  | 13.6481264 |
| C | 5.9863918  | 2.8586017  | 15.3246385 |
| H | 5.7622002  | 3.4552415  | 16.2293868 |
| C | 4.6274410  | 2.4574830  | 14.7129919 |
| H | 4.0559968  | 3.3684288  | 14.4435391 |
| H | 4.0343089  | 1.8644369  | 15.4413635 |
| H | 4.7589957  | 1.8361992  | 13.8017902 |
| C | 6.7783891  | 1.6025479  | 15.7414863 |
| H | 6.9433235  | 0.9239182  | 14.8783997 |
| H | 6.2241706  | 1.0246219  | 16.5106751 |
| H | 7.7781655  | 1.8492136  | 16.1540279 |
| C | 7.9090968  | 7.4528093  | 13.8242366 |
| H | 7.6683866  | 7.7105693  | 14.8735865 |
| C | 6.9510843  | 8.2681755  | 12.9276988 |
| H | 7.1952526  | 8.1216835  | 11.8534333 |
| H | 7.0358702  | 9.3530928  | 13.1489368 |
| H | 5.9015059  | 7.9490148  | 13.0884754 |
| C | 9.3744187  | 7.8624001  | 13.5735314 |
| H | 9.6772327  | 7.6910966  | 12.5193793 |
| H | 10.0815154 | 7.2985636  | 14.2160562 |
| H | 9.5157216  | 8.9435497  | 13.7820194 |
| K | 1.5797309  | 7.9014520  | 13.7825300 |
| O | -0.3215742 | 8.6937658  | 16.0222870 |
| C | 0.2048695  | 9.9076393  | 16.5359007 |
| H | 1.2789567  | 9.7860104  | 16.8141909 |
| H | -0.3545710 | 10.2243210 | 17.4520510 |
| C | 0.0669184  | 10.9942627 | 15.4880235 |
| H | -0.9959086 | 11.0584872 | 15.1470698 |
| H | 0.3328557  | 11.9766575 | 15.9510733 |
| O | 0.9253555  | 10.7119981 | 14.3939380 |
| C | 0.8962791  | 11.6957883 | 13.3791448 |
| H | 1.1433690  | 12.7048997 | 13.7939757 |
| H | -0.1198608 | 11.7635060 | 12.9169454 |
| C | 1.9194067  | 11.3481072 | 12.3150393 |

|   |            |            |            |
|---|------------|------------|------------|
| H | 1.9732955  | 12.1885292 | 11.5789797 |
| H | 2.9277990  | 11.2444471 | 12.7848358 |
| O | 1.5353789  | 10.1424592 | 11.6733808 |
| C | 2.4104096  | 9.7559025  | 10.6260124 |
| H | 3.4434514  | 9.5830779  | 11.0144500 |
| H | 2.4720689  | 10.5548164 | 9.8455958  |
| C | 1.8887269  | 8.4851047  | 9.9835665  |
| H | 0.8425600  | 8.6471645  | 9.6231859  |
| H | 2.5192150  | 8.2530663  | 9.0893205  |
| O | 1.9394709  | 7.4305726  | 10.9245669 |
| C | 1.5456996  | 6.1739084  | 10.3948022 |
| H | 2.2046719  | 5.8863109  | 9.5387070  |
| H | 0.4960193  | 6.2211702  | 10.0130344 |
| C | 1.6531388  | 5.1125721  | 11.4714266 |
| H | 1.4930326  | 4.1106420  | 11.0001661 |
| H | 2.6788637  | 5.1260525  | 11.9116843 |
| O | 0.6735478  | 5.3580881  | 12.4705044 |
| C | 0.7188641  | 4.4079528  | 13.5292908 |
| H | 1.7298844  | 4.4083070  | 14.0039176 |
| H | 0.5075379  | 3.3798274  | 13.1427106 |
| C | -0.3238703 | 4.7654346  | 14.5700818 |
| H | -1.3346857 | 4.8414409  | 14.0971409 |
| H | -0.3661751 | 3.9427619  | 15.3259846 |
| O | 0.0394252  | 5.9891320  | 15.1830102 |
| C | -0.7589222 | 6.3545786  | 16.2940215 |
| H | -0.7683556 | 5.5382491  | 17.0579956 |
| H | -1.8171139 | 6.5363313  | 15.9807947 |
| C | -0.1808533 | 7.6046445  | 16.9279532 |
| H | -0.7304421 | 7.8126315  | 17.8799535 |
| H | 0.8983179  | 7.4415408  | 17.1682974 |

**[K(18-crown-6)(IDipp-CS<sub>2</sub>)]**

Energy = -3517.829972356

|   |            |            |            |
|---|------------|------------|------------|
| O | -0.8730397 | 7.7986538  | 10.7909512 |
| C | -1.0784609 | 7.0235612  | 9.6145824  |
| H | -2.1666060 | 6.8033859  | 9.4761600  |
| H | -0.5274421 | 6.0543919  | 9.6927580  |
| C | -0.5828488 | 7.8028152  | 8.4124975  |
| H | -0.8780008 | 7.2549703  | 7.4837323  |
| H | -1.0700755 | 8.8090974  | 8.3810108  |
| O | 0.8257750  | 7.9300144  | 8.4901095  |
| C | 1.4159328  | 8.5799306  | 7.3776445  |
| H | 1.0680109  | 9.6409078  | 7.3102699  |
| H | 1.1285727  | 8.0688665  | 6.4259237  |
| C | 2.9248722  | 8.5311153  | 7.5138374  |
| H | 3.2572835  | 7.4742172  | 7.6585105  |
| H | 3.3830283  | 8.9229021  | 6.5712966  |
| O | 3.3226168  | 9.3251287  | 8.6270637  |
| C | 4.7244999  | 9.2921648  | 8.8448948  |
| H | 5.2713953  | 9.7054859  | 7.9602575  |
| H | 5.0737498  | 8.2442393  | 9.0052980  |
| C | 5.0646075  | 10.1370672 | 10.0562316 |
| H | 6.1761190  | 10.2380681 | 10.1237872 |
| H | 4.6392028  | 11.1636909 | 9.9332663  |
| O | 4.5497222  | 9.5227884  | 11.2274398 |
| C | 4.8470139  | 10.2302087 | 12.4148970 |
| H | 4.3934336  | 11.2521893 | 12.3941017 |
| H | 5.9516932  | 10.3564595 | 12.5388227 |
| C | 4.3109100  | 9.4599822  | 13.6060950 |
| H | 4.7328397  | 8.4254828  | 13.6056007 |
| H | 4.6529376  | 9.9639986  | 14.5442819 |
| O | 2.8944919  | 9.4278901  | 13.5403928 |
| C | 2.2906470  | 8.7702137  | 14.6428449 |
| H | 2.5777256  | 9.2641797  | 15.6045287 |
| H | 2.6191648  | 7.7039498  | 14.6983008 |
| C | 0.7827722  | 8.8298801  | 14.4926011 |
| H | 0.3153895  | 8.4157424  | 15.4207196 |
| H | 0.4552679  | 9.8952089  | 14.3991477 |
| O | 0.3985560  | 8.0817860  | 13.3566276 |
| C | -1.0059027 | 7.9998173  | 13.1731448 |
| H | -1.4434660 | 9.0186085  | 13.0289103 |
| H | -1.4925038 | 7.5471138  | 14.0722434 |
| C | -1.3091697 | 7.1336503  | 11.9669576 |
| H | -0.7974427 | 6.1476326  | 12.0737623 |
| H | -2.4123098 | 6.9488571  | 11.9294185 |
| S | 1.5773475  | 4.6946946  | 11.3054794 |
| C | 3.0146619  | 4.3728482  | 10.3601240 |

|   |            |            |            |
|---|------------|------------|------------|
| S | 4.0525898  | 5.6239001  | 9.7145393  |
| C | 3.3766734  | 3.0126533  | 10.1251911 |
| N | 2.9934001  | 1.8733205  | 10.8626643 |
| C | 3.5884767  | 0.7363559  | 10.3122342 |
| H | 3.4380878  | -0.2497412 | 10.7595768 |
| C | 4.3294439  | 1.1243614  | 9.2357757  |
| H | 4.9196771  | 0.5398553  | 8.5250672  |
| N | 4.2171574  | 2.5100952  | 9.1105615  |
| C | 2.3009623  | 1.7869010  | 12.1266090 |
| C | 0.9978807  | 1.2210333  | 12.1438231 |
| C | 0.3915688  | 0.9991432  | 13.3949684 |
| H | -0.6226108 | 0.5711522  | 13.4332836 |
| C | 1.0495327  | 1.3230789  | 14.5891064 |
| C | 2.3365667  | 1.8750018  | 14.5468989 |
| H | 2.8497790  | 2.1255022  | 15.4887871 |
| C | 2.9944300  | 2.1095668  | 13.3236981 |
| C | 4.3973310  | 2.7132737  | 13.3224774 |
| H | 4.7222440  | 2.8115627  | 12.2676589 |
| C | 0.2283017  | 0.9104339  | 10.8607135 |
| H | 0.9018382  | 1.1357861  | 10.0092853 |
| C | 4.7083228  | 3.1809101  | 7.9314698  |
| C | 3.8140375  | 3.4343824  | 6.8573986  |
| C | 4.3470437  | 3.9903505  | 5.6775329  |
| H | 3.6733265  | 4.2055982  | 4.8330271  |
| C | 5.7164012  | 4.2588330  | 5.5523937  |
| C | 6.5829141  | 3.9724458  | 6.6164540  |
| H | 7.6586175  | 4.1849074  | 6.5121322  |
| C | 6.1027077  | 3.4306356  | 7.8235081  |
| C | 2.3191278  | 3.1315954  | 6.9443297  |
| H | 2.1255583  | 2.6669969  | 7.9316961  |
| C | 7.0673120  | 3.1728110  | 8.9800341  |
| H | 6.4710216  | 2.7618776  | 9.8195709  |
| K | 2.1499317  | 7.8286624  | 11.0016658 |
| H | 6.1122206  | 4.6858323  | 4.6175231  |
| H | 0.5576679  | 1.1417172  | 15.5576335 |
| C | 1.4767256  | 4.4221980  | 6.8886357  |
| H | 1.5961536  | 4.9371277  | 5.9110756  |
| H | 0.3992888  | 4.1850716  | 7.0125447  |
| H | 1.7749699  | 5.1222370  | 7.6944806  |
| C | 1.8793823  | 2.1196784  | 5.8662944  |
| H | 2.0117521  | 2.5265420  | 4.8415969  |
| H | 2.4613299  | 1.1776361  | 5.9293913  |
| H | 0.8053743  | 1.8655972  | 5.9850513  |
| C | -0.1669451 | -0.5759558 | 10.7603879 |
| H | 0.7178806  | -1.2424941 | 10.8215154 |
| H | -0.8621460 | -0.8716745 | 11.5741531 |
| H | -0.6803185 | -0.7802494 | 9.7976214  |
| C | -0.9949127 | 1.8395790  | 10.7202276 |
| H | -1.5095604 | 1.6644879  | 9.7518448  |
| H | -1.7344383 | 1.6642607  | 11.5302052 |
| H | -0.6664921 | 2.8981570  | 10.7647428 |
| C | 4.3884996  | 4.1368096  | 13.9173486 |
| H | 4.1387105  | 4.1207359  | 15.0000431 |
| H | 5.3864255  | 4.6097601  | 13.8069604 |
| H | 3.6390809  | 4.7637167  | 13.3923885 |
| C | 5.4152061  | 1.8012552  | 14.0370040 |
| H | 5.1670631  | 1.6724039  | 15.1117277 |
| H | 5.4508365  | 0.7916275  | 13.5790812 |
| H | 6.4348860  | 2.2365276  | 13.9820577 |
| C | 8.1407087  | 2.1280424  | 8.6141486  |
| H | 7.6885975  | 1.1668844  | 8.2934286  |
| H | 8.7902050  | 2.4815262  | 7.7857047  |
| H | 8.7978405  | 1.9202509  | 9.4843791  |
| C | 7.6974109  | 4.4874243  | 9.4829423  |
| H | 8.3458462  | 4.2956054  | 10.3637885 |
| H | 8.3267095  | 4.9647306  | 8.7019977  |
| H | 6.8968181  | 5.1960543  | 9.7780208  |

**[K(18-crown-6)(IMes-CS<sub>2</sub>)]**

Energy = -3281.938171186

|   |            |           |            |
|---|------------|-----------|------------|
| O | -0.9116644 | 7.8797751 | 10.5491520 |
| C | -1.0273331 | 7.0357640 | 9.4079667  |
| H | -2.1039727 | 6.8357850 | 9.1777154  |
| H | -0.5140616 | 6.0609796 | 9.5998817  |
| C | -0.3930879 | 7.7210655 | 8.2138906  |
| H | -0.6152169 | 7.1186865 | 7.2983089  |
| H | -0.8430654 | 8.7347342 | 8.0669806  |

|   |            |             |            |
|---|------------|-------------|------------|
| O | 1.0045558  | 7.8183181   | 8.4206272  |
| C | 1.7227666  | 8.3470994   | 7.3198977  |
| H | 1.3955705  | 9.3942589   | 7.1010798  |
| H | 1.5390825  | 7.7375220   | 6.4006843  |
| C | 3.2060289  | 8.3196219   | 7.6304784  |
| H | 3.5175924  | 7.2881131   | 7.9263724  |
| H | 3.7696880  | 8.6071825   | 6.7078347  |
| O | 3.4794625  | 9.2359597   | 8.6858656  |
| C | 4.8532104  | 9.2546355   | 9.0437538  |
| H | 5.4792442  | 9.6055840   | 8.1846193  |
| H | 5.1967924  | 8.2308128   | 9.3254952  |
| C | 5.0564076  | 10.2073560  | 10.2048633 |
| H | 6.1540218  | 10.3369313  | 10.3752340 |
| H | 4.6338662  | 11.21110057 | 9.9508452  |
| O | 4.4321463  | 9.6842198   | 11.3667442 |
| C | 4.6122134  | 10.4826747  | 12.5185898 |
| H | 4.1507943  | 11.4924394  | 12.3822014 |
| H | 5.6996422  | 10.6378265  | 12.7315269 |
| C | 3.9803516  | 9.7902461   | 13.7109697 |
| H | 4.4112569  | 8.7650173   | 13.8192796 |
| H | 4.2329480  | 10.3640165  | 14.6374187 |
| O | 2.5755209  | 9.7304277   | 13.5244274 |
| C | 1.8845274  | 9.1280499   | 14.6062505 |
| H | 2.0779821  | 9.6819917   | 15.5586913 |
| H | 2.2199893  | 8.0725922   | 14.7549668 |
| C | 0.3954230  | 9.1527323   | 14.3197116 |
| H | -0.1493208 | 8.7899624   | 15.2270633 |
| H | 0.0669664  | 10.2048774  | 14.1302617 |
| O | 0.1212919  | 8.3296168   | 13.2037095 |
| C | -1.2596705 | 8.2293427   | 12.8936390 |
| H | -1.6805064 | 9.2351444   | 12.6457385 |
| H | -1.8293366 | 7.8316397   | 13.7698336 |
| C | -1.4512568 | 7.2880871   | 11.7210787 |
| H | -0.9511205 | 6.3136614   | 11.9356085 |
| H | -2.5467587 | 7.0953417   | 11.5968395 |
| S | 1.4173404  | 4.8191973   | 11.2658431 |
| C | 2.9987918  | 4.5277079   | 10.5784664 |
| S | 4.2400979  | 5.7392268   | 10.3411284 |
| C | 3.3190242  | 3.1862707   | 10.2152872 |
| N | 2.8484407  | 2.0058446   | 10.8122551 |
| C | 3.4218307  | 0.9024640   | 10.1734508 |
| H | 3.2162026  | -0.1167365  | 10.5130362 |
| C | 4.2338555  | 1.3642469   | 9.1785234  |
| H | 4.8228874  | 0.8278672   | 8.4290926  |
| N | 4.1871295  | 2.7620380   | 9.1966341  |
| C | 2.2259669  | 1.8820583   | 12.1059514 |
| C | 0.8882033  | 1.4291688   | 12.1822664 |
| C | 0.3396840  | 1.1969115   | 13.4567491 |
| H | -0.7039499 | 0.8475713   | 13.5263832 |
| C | 1.0755257  | 1.4146900   | 14.6375897 |
| C | 2.4017589  | 1.8736723   | 14.5177402 |
| H | 2.9988604  | 2.0444202   | 15.4291912 |
| C | 3.0031922  | 2.1103833   | 13.2675467 |
| C | 4.4277412  | 2.5988241   | 13.1696276 |
| H | 5.0324070  | 1.9624200   | 12.4899301 |
| H | 4.9161327  | 2.5991370   | 14.1635194 |
| H | 4.4720341  | 3.6290432   | 12.7556026 |
| C | 0.0566729  | 1.2901190   | 10.9330536 |
| H | -0.0091727 | 2.2895230   | 10.4472614 |
| H | -0.9655789 | 0.9349587   | 11.1674950 |
| H | 0.5028295  | 0.5938196   | 10.1931656 |
| C | 0.4507196  | 1.1949885   | 15.9971575 |
| H | -0.3651200 | 0.4457187   | 15.9577735 |
| H | 0.0103261  | 2.1362760   | 16.3935700 |
| H | 1.1975111  | 0.8503649   | 16.7408518 |
| C | 4.6709180  | 3.5417452   | 8.0875874  |
| C | 3.7618212  | 3.9436445   | 7.0782912  |
| C | 4.2807804  | 4.6014465   | 5.9469677  |
| H | 3.5817422  | 4.9122793   | 5.1521829  |
| C | 5.6588483  | 4.8516119   | 5.7909020  |
| C | 6.5269807  | 4.4415575   | 6.8210753  |
| H | 7.6067349  | 4.6468078   | 6.7315118  |
| C | 6.0597670  | 3.7905712   | 7.9778697  |
| C | 2.2808781  | 3.6910582   | 7.2199933  |
| H | 1.7449910  | 3.9325847   | 6.2811692  |
| H | 1.8503440  | 4.3021000   | 8.0422823  |
| H | 2.0685089  | 2.6319165   | 7.4744447  |

|   |           |           |            |
|---|-----------|-----------|------------|
| C | 6.1913453 | 5.5101025 | 4.5377493  |
| H | 6.3422162 | 4.7667257 | 3.7241880  |
| H | 7.1697319 | 5.9992145 | 4.7162380  |
| H | 5.4912653 | 6.2759840 | 4.1463455  |
| C | 6.9886063 | 3.4501682 | 9.1143673  |
| H | 6.9577578 | 2.3753681 | 9.3880093  |
| H | 6.6661710 | 4.0274737 | 10.0101511 |
| H | 8.0361356 | 3.7142792 | 8.8715137  |
| K | 2.0758409 | 7.9343694 | 11.0459242 |

**[Mg(<sup>Dipp</sup>NacNac)(cAAC<sup>Me</sup>-CS<sub>2</sub>)]**

Energy = -3109.764721155

|    |            |            |            |
|----|------------|------------|------------|
| S  | 6.1225517  | 14.8814549 | 4.6120461  |
| S  | 3.1648234  | 15.0930080 | 5.0156658  |
| Mg | 4.3667646  | 14.9662523 | 2.8102068  |
| N  | 4.0796470  | 13.4277752 | 1.4368315  |
| N  | 6.1053642  | 14.8570176 | 7.8469997  |
| C  | 3.6855268  | 13.6705531 | 0.1725735  |
| C  | 3.5034701  | 14.9637209 | -0.3817557 |
| H  | 3.1591309  | 14.9644159 | -1.4242059 |
| C  | 4.9206176  | 15.0285043 | 7.1535250  |
| C  | 4.3728282  | 12.0804431 | 1.8391975  |
| C  | 4.7720268  | 15.0100694 | 5.7267421  |
| C  | 7.4469372  | 15.0583646 | 7.3338368  |
| C  | 5.6758917  | 11.5432220 | 1.5999837  |
| C  | 3.4501441  | 12.5031527 | -0.7705257 |
| H  | 2.9768928  | 12.8346966 | -1.7125198 |
| H  | 2.8163951  | 11.7261524 | -0.3007963 |
| H  | 4.4091261  | 12.0053565 | -1.0217074 |
| C  | 3.7555479  | 15.2215563 | 8.1614235  |
| C  | 6.7629264  | 12.3353791 | 0.8677226  |
| H  | 6.2998094  | 13.2733608 | 0.4997706  |
| C  | 7.9160656  | 16.3994750 | 7.1806524  |
| C  | 5.9680009  | 10.2448759 | 2.0620767  |
| H  | 6.9708004  | 9.8245452  | 1.8853042  |
| C  | 3.3905288  | 11.3052915 | 2.5276551  |
| C  | 5.0113689  | 9.4770091  | 2.7381438  |
| H  | 5.2593258  | 8.4628492  | 3.0878446  |
| C  | 3.7364726  | 10.0097575 | 2.9629235  |
| H  | 2.9836571  | 9.4029668  | 3.4904915  |
| C  | 7.0505377  | 17.6352942 | 7.4419176  |
| H  | 6.1177072  | 17.2957549 | 7.9351810  |
| C  | 9.2362881  | 16.5936844 | 6.7309586  |
| H  | 9.6098596  | 17.6202244 | 6.5963170  |
| C  | 10.0818551 | 15.5140496 | 6.4532587  |
| H  | 11.1111688 | 15.6917239 | 6.1053444  |
| C  | 7.9114944  | 12.7333392 | 1.8174740  |
| H  | 8.6656540  | 13.3511476 | 1.2864461  |
| H  | 8.4323241  | 11.8373602 | 2.2155110  |
| H  | 7.5409151  | 13.3138391 | 2.6858577  |
| C  | 5.8782926  | 14.6649092 | 9.3389970  |
| C  | 1.9712043  | 11.8201972 | 2.7794364  |
| H  | 1.9485508  | 12.8851046 | 2.4671941  |
| C  | 7.3129470  | 11.5797234 | -0.3599992 |
| H  | 6.5062310  | 11.2839003 | -1.0613209 |
| H  | 7.8512449  | 10.6545161 | -0.0658633 |
| H  | 8.0315244  | 12.2144531 | -0.9189262 |
| C  | 7.7311042  | 18.6459818 | 8.3889781  |
| H  | 8.6267102  | 19.1055753 | 7.9226265  |
| H  | 8.0576665  | 18.1796656 | 9.3407886  |
| H  | 7.0331989  | 19.4728378 | 8.6345811  |
| C  | 6.6433968  | 18.3285683 | 6.1240955  |
| H  | 7.5327880  | 18.7326511 | 5.5974914  |
| H  | 5.9587996  | 19.1783416 | 6.3246903  |
| H  | 6.1379610  | 17.6280165 | 5.4324517  |
| C  | 0.9304273  | 11.0631769 | 1.9255404  |
| H  | 1.1567283  | 11.1221001 | 0.8419991  |
| H  | -0.0849876 | 11.4839854 | 2.0803131  |
| H  | 0.8925335  | 9.9876564  | 2.1989504  |
| C  | 1.5847929  | 11.7632306 | 4.2702978  |
| H  | 0.5747523  | 12.1967292 | 4.4250864  |
| H  | 2.2973752  | 12.3415687 | 4.8909705  |
| H  | 1.5567946  | 10.7194037 | 4.6477647  |
| C  | 6.9714581  | 15.3311130 | 10.1846909 |
| H  | 7.9640021  | 14.8710322 | 10.0130985 |
| H  | 6.7173370  | 15.2041974 | 11.2563074 |
| H  | 7.0518476  | 16.4149028 | 9.9818022  |

|   |            |            |            |
|---|------------|------------|------------|
| C | 2.7678592  | 14.0277474 | 8.1729538  |
| H | 2.2477076  | 13.9464611 | 7.2000695  |
| H | 2.0070969  | 14.1844177 | 8.9657628  |
| H | 3.2729579  | 13.0630218 | 8.3718805  |
| C | 4.5137160  | 15.3531772 | 9.5096729  |
| H | 4.6804035  | 16.4274807 | 9.7331584  |
| C | 8.2940417  | 13.9477371 | 7.0506746  |
| C | 7.8371005  | 12.4907024 | 7.1296920  |
| H | 6.7869007  | 12.4913570 | 7.4782057  |
| C | 9.6088042  | 14.2080020 | 6.6166968  |
| H | 10.2718897 | 13.3606387 | 6.3836595  |
| C | 8.6834517  | 11.6779673 | 8.1324606  |
| H | 9.7282886  | 11.5631796 | 7.7761995  |
| H | 8.7335159  | 12.1563102 | 9.1321294  |
| H | 8.2663993  | 10.6575235 | 8.2603967  |
| C | 7.8444824  | 11.8067353 | 5.7471309  |
| H | 8.8708508  | 11.7452922 | 5.3289752  |
| H | 7.4531846  | 10.7714744 | 5.8273190  |
| H | 7.2120381  | 12.3619680 | 5.0282962  |
| C | 5.8028345  | 13.1696705 | 9.7234763  |
| H | 6.7931362  | 12.6829097 | 9.6773517  |
| H | 5.4400167  | 13.0860960 | 10.7680415 |
| H | 5.1052798  | 12.6055172 | 9.0765280  |
| C | 2.9624227  | 16.5306505 | 7.9246880  |
| H | 2.3367633  | 16.4755058 | 7.0158845  |
| H | 2.3017912  | 16.7116405 | 8.7990075  |
| H | 3.6418009  | 17.4014817 | 7.8252068  |
| H | 3.9355757  | 14.9299600 | 10.3546556 |
| N | 4.1709092  | 16.4962856 | 1.4088795  |
| C | 3.7734880  | 16.2531973 | 0.1457349  |
| C | 4.4959406  | 17.8397574 | 1.8020487  |
| C | 5.8541794  | 18.2796168 | 1.7315768  |
| C | 3.6183247  | 17.4141806 | -0.8212169 |
| H | 3.2845768  | 17.0706821 | -1.8168512 |
| H | 2.8929185  | 18.1591768 | -0.4399463 |
| H | 4.5777666  | 17.9574279 | -0.9373301 |
| C | 6.9721260  | 17.3911780 | 1.1794799  |
| H | 6.5235919  | 16.4013727 | 0.9545282  |
| C | 6.1686634  | 19.5818981 | 2.1681610  |
| H | 7.2126698  | 19.9290801 | 2.1124686  |
| C | 3.4844915  | 18.7102363 | 2.3136315  |
| C | 5.1839972  | 20.4434044 | 2.6671721  |
| H | 5.4504557  | 21.4581218 | 3.0012291  |
| C | 3.8571879  | 20.0019186 | 2.7374577  |
| H | 3.0836453  | 20.6799164 | 3.1319418  |
| C | 8.0996648  | 17.1687039 | 2.2074746  |
| H | 8.8623702  | 16.4706727 | 1.8036463  |
| H | 8.6203263  | 18.1181455 | 2.4532138  |
| H | 7.7107248  | 16.7401703 | 3.1530431  |
| C | 2.0133244  | 18.2971548 | 2.4144095  |
| H | 1.9329999  | 17.2614402 | 2.0245573  |
| C | 7.5445520  | 17.9475214 | -0.1421175 |
| H | 6.7579311  | 18.0809880 | -0.9119650 |
| H | 8.0293909  | 18.9345059 | 0.0118445  |
| H | 8.3108743  | 17.2609082 | -0.5585268 |
| C | 1.0960457  | 19.1949177 | 1.5558495  |
| H | 1.4108823  | 19.2242611 | 0.4929823  |
| H | 0.0495064  | 18.8266631 | 1.5869983  |
| H | 1.0900411  | 20.2411665 | 1.9269441  |
| C | 1.5237968  | 18.2823687 | 3.8771135  |
| H | 0.4692267  | 17.9393638 | 3.9317863  |
| H | 2.1365266  | 17.5996289 | 4.4992795  |
| H | 1.5674488  | 19.2959704 | 4.3284153  |

## 10 References

- [1] L. Delaude, A. Demonceau, J. Wouters, *Eur. J. Inorg. Chem.* **2009**, 1882
- [2] N. Kuhn, G. Weyers, G. Henkel, *Chem. Commun.* **1997**, 627.
- [3] J. Attner, U. Radius, *Chem. Eur. J.* **2001**, 7, 783.
- [4] a) A. J. Arduengo, H. V. R. Dias, R. L. Harlow, M. Kline, *J. Am. Chem. Soc.* **1992**, 114, 5530; b) A. J. Arduengo, University of Alabama, US-5182405-A, **1991**; c) T. T. Schaub, U. Radius, A. Brucks, M. P. Choules, M. T. Olsen, T. B. Rauchfuss, *Inorg. Synth.* **2010**, 35, 78.
- [5] V. Lavallo, Y. Canac, C. Präsang, B. Donnadiou, G. Bertrand, *Angew. Chem. Int. Ed.* **2005**, 44, 5705.
- [6] S. P. Green, C. Jones, A. Stasch, *Science* **2007**, 318, 1754.
- [7] a) J.-M. Lalancette, G. Rollin, P. Dumas, *Can. J. Chem.* **1972**, 50, 3058; b) D. E. Bergbreiter, J. M. Killough, *J. Am. Chem. Soc.* **1978**, 100, 2126.
- [8] a) D. F. Evans, *J. Chem. Soc.* **1959**, 2003; b) S. K. Sur, *J. Magn. Reson.* **1989**, 82, 169.
- [9] G. R. Fulmer, A. J. M. Miller, N. H. Sherden, H. E. Gottlieb, A. Nudelman, B. M. Stoltz, J. E. Bercaw, K. I. Goldberg, *Organometallics* **2010**, 29, 2176.
- [10] M. R. Willcott, *J. Am. Chem. Soc.* **2009**, 131, 13180.
- [11] S. Stoll, A. Schweiger, *J. Magn. Reson.* **2006**, 178, 42.
- [12] Opus 8.1, **2017**, Bruker Optik GmbH,
- [13] AfterMath Data Organizer 1.6.10515, **2021**, Pine Research Instrumentation,
- [14] NOVA 2.1.2, **2017**, Metrohm Autolab B.V., Utrecht.
- [15] Origin(Pro), **2020**, OriginLab Corporation, Northampton, MA, USA.
- [16] a) G. M. Sheldrick, *Acta Cryst. Sect. C Struct. Chem.* **2015**, 71, 3; b) G. M. Sheldrick, *Acta Cryst. Sect. A Found. Adv.* **2015**, 71, 3.
- [17] a) Diamond 4.6.6, **2021**, Bonn; b) W. T. Pennington, *J. Appl. Cryst.* **1999**, 32, 1028; c) M. B. Günter Bergerhoff, Klaus Brandenburg, *J. Res. Natl. Inst. Stan. Technol.* **1996**, 101, 221.
- [18] a) F. Furche, R. Ahlrichs, C. Hättig, W. Klopper, M. Sierka, F. Weigend, *WIREs Comput. Mol. Sci.* **2014**, 4, 91; b) R. Ahlrichs, M. Bär, M. Häser, H. Horn, C. Kölmel, *Chem. Phys. Lett.* **1989**, 162, 165.
- [19] a) Häser, M.; Ahlrichs, R., *J. Comput. Chem.* **1989**, 10, 104–111; b) Treutler O.; Ahlrichs, R., *J. Chem. Phys. C.* **1995**, 102, 346–354; c) Sierka, M.; Hogekamp A.; Ahlrichs, R., *J. Chem. Phys.* **2003**, 118, 9136–9148.
- [20] a) Becke, A. D., *Phys. Rev. A* **1988**, 38, 3098–3100; b) Perdew, J. P., *Phys. Rev. B* **1986**, 33, 8822–8824; erratum: Perdew, J. P., *Phys. Rev. B* **1986**, 34, 7406.

- [21] a) A. Schäfer, C. Huber, R. J. Ahlrichs, *J. Chem. Phys.* **1994**, 100, 5829–5835; b) K. Eichkorn, O. Treutler, H. Öhm, M. Häser, R. Ahlrichs, *Chem. Phys. Lett.* **1995**, 242, 652–660; c) K. Eichkorn, F. Weigend, O. Treutler, R. Ahlrichs, *Theor. Chem. Acc.* **1997**, 97, 119–124; d) K. Eichkorn, O. Treutler, H. Öhm, M. Häser, R. Ahlrichs, *Chem. Phys. Lett.* **1995**, 242, 652–660; e) F. Weigend, R. Ahlrichs, *Phys. Chem. Chem. Phys.* **2005**, 7, 3297–3305.
- [22] P. Deglmann, K. May, F. Furche, R. Ahlrichs, *Chem. Phys. Lett.* **2004**, 384, 103–107.
- [23] a) A. D. Becke, *J. Chem. Phys.* **1986**, 84, 4524–4529; b) A. D. Becke, *Phys. Rev. A* **1988**, 38, 3098–3100; c) A. D. Becke, *J. Chem. Phys.* **1998**, 98, 5648–5652.
- [24] a) F. Furche, R. Ahlrichs, *J. Chem. Phys.* **2002**, 117, 7433; b) F. Furche, R. Ahlrichs, *J. Chem. Phys.* **2004**, 121, 12772; c) D. Rappoport, F. Furche, *J. Chem. Phys.* **2005**, 122, 064105; d) M. Olivucci, *Computational and Theoretical Chemistry*, Elsevier, Amsterdam, **2005**, Vol. 16, Ch. 3.
- [25] J.-D. Chai, M. Head-Gordon, *J. Chem. Phys.* **2008**, 128, 084106.
